# Supplementary material for: Isolation of Novel Bacteria Including Rarely Cultivated Phyla, Acidobacteria and Verrucomicrobia, from the Roots of Emergent Plants by Simple Culturing Method
Source: PubMed Central journal article supplement (PMC5606700; doi:10.1264/jsme2.me17027), 2017-09-27
Supplement: 32_288_s1.pdf [file 32_288_s1.pdf]

**Table S1.** Phylogenetic affiliations of 16S rRNA gene clones

| Clone-<br>phylotype<br>No. | Total no. of clones         |                               |            | Related authentic species                              |                               |                 | Phylum (Class)<br>classified by CLASSIFIER | Compared<br>length<br>(bp) |
|----------------------------|-----------------------------|-------------------------------|------------|--------------------------------------------------------|-------------------------------|-----------------|--------------------------------------------|----------------------------|
|                            | <i>Iris<br/>pseudacorus</i> | <i>Scirpus<br/>juncooides</i> | Pond water | Specis (Accession no.)                                 | Phylum (Class)                | Identity<br>(%) |                                            |                            |
| 1                          | 1                           |                               |            | <i>Geothrix fermentans</i> (U41563)                    | <i>Acidobacteria</i>          | 96.71           | ● <i>Acidobacteria</i>                     | 790                        |
| 2                          | 1                           |                               |            | <i>Methylocystis heyeri</i> (AM283543)                 | <i>Proteobacteria</i> (Alpha) | 94.29           | ● <i>Proteobacteria</i> (Alpha)            | 805                        |
| 3                          | 1                           |                               |            | <i>Methylocystis heyer</i> (AM283543)                  | <i>Proteobacteria</i> (Alpha) | 93.93           | ● <i>Proteobacteria</i> (Alpha)            | 758                        |
| 4                          | 1                           |                               |            | <i>Methylocystis heyeri</i> (AM283543)                 | <i>Proteobacteria</i> (Alpha) | 94.06           | ● <i>Proteobacteria</i> (Alpha)            | 758                        |
| 5                          | 1                           |                               |            | <i>Novosphingobium lentum</i> (AJ303009)               | <i>Proteobacteria</i> (Alpha) | 97.69           | ● <i>Proteobacteria</i> (Alpha)            | 735                        |
| 6                          | 2                           |                               |            | <i>Pelobacter propionicus</i> (X70954)                 | <i>Proteobacteria</i> (Delta) | 98.01           | ● <i>Proteobacteria</i> (Delta)            | 722                        |
| 7                          | 1                           |                               |            | <i>Pelobacter propionicus</i> (X70954)                 | <i>Proteobacteria</i> (Delta) | 96.42           | ● <i>Proteobacteria</i> (Delta)            | 755                        |
| 8                          | 1                           |                               |            | <i>Novosphingobium hassiacum</i> (AJ416411)            | <i>Proteobacteria</i> (Alpha) | 97.86           | ● <i>Proteobacteria</i> (Alpha)            | 702                        |
| 9                          | 4                           |                               |            | <i>Rhodomicrobium vannielii</i> (FN666247)             | <i>Proteobacteria</i> (Alpha) | 97.28           | ● <i>Proteobacteria</i> (Alpha)            | 773                        |
| 10                         | 1                           |                               |            | <i>Dehalogenimonas alkenigignens</i> (JQ994266)        | <i>Chloroflexi</i>            | 85.10           | ● <i>Chloroflexi</i>                       | 719                        |
| 11                         | 1                           |                               |            | <i>Clostridium saccharoperbutylacetonicum</i> (U16122) | <i>Firmicutes</i>             | 99.45           | ● <i>Firmicutes</i>                        | 729                        |
| 12                         | 1                           |                               |            | <i>Clostridium saccharoperbutylacetonicum</i> (U16122) | <i>Firmicutes</i>             | 99.56           | ● <i>Firmicutes</i>                        | 687                        |
| 13                         | 1                           |                               |            | <i>Fimbriimonas ginsengisoli</i> (GQ339893)            | <i>Armatimonadetes</i>        | 88.32           | ● <i>Armatimonadetes</i>                   | 737                        |
| 14                         | 1                           |                               |            | <i>Clostridium saccharoperbutylacetonicum</i> (U16122) | <i>Firmicutes</i>             | 99.87           | ● <i>Firmicutes</i>                        | 756                        |
| 15                         | 1                           |                               |            | <i>Leptospira terpstreae</i> (AOGW02000008)            | <i>Spirochaetes</i>           | 83.86           | ●Unclassified                              | 591                        |
| 16                         | 3                           |                               |            | <i>Rhodoblastus acidophilus</i> (FR733696)             | <i>Proteobacteria</i> (Alpha) | 98.84           | ● <i>Proteobacteria</i> (Alpha)            | 777                        |
| 17                         | 1                           |                               |            | <i>Paludibacter propioniciigenes</i> (AB078842)        | <i>Bacteroidetes</i>          | 88.52           | ● <i>Bacteroidetes</i>                     | 775                        |
| 18                         | 1                           |                               |            | <i>Rhodoblastus acidophilus</i> (FR733696)             | <i>Proteobacteria</i> (Alpha) | 98.71           | ● <i>Proteobacteria</i> (Alpha)            | 777                        |
| 19                         | 1                           |                               |            | <i>Methylocystis bryophila</i> (FN422003)              | <i>Proteobacteria</i> (Alpha) | 94.71           | ● <i>Proteobacteria</i> (Alpha)            | 699                        |
| 20                         | 1                           |                               |            | <i>Uliginosibacterium gangwonense</i> (DQ665916)       | <i>Proteobacteria</i> (Beta)  | 96.56           | ● <i>Proteobacteria</i> (Beta)             | 727                        |
| 21                         | 2                           |                               |            | <i>Georgfuchsia toluolica</i> (EF219370)               | <i>Proteobacteria</i> (Beta)  | 94.91           | ● <i>Proteobacteria</i> (Beta)             | 746                        |
| 22                         | 5                           |                               |            | <i>Rhodoblastus sphagnicola</i> (AM040096)             | <i>Proteobacteria</i> (Alpha) | 98.93           | ● <i>Proteobacteria</i> (Alpha)            | 746                        |
| 23                         | 1                           |                               |            | <i>Rhodoblastus sphagnicola</i> (AM040096)             | <i>Proteobacteria</i> (Alpha) | 99.12           | ● <i>Proteobacteria</i> (Alpha)            | 684                        |
| 24                         | 4                           |                               |            | <i>Alkaliflexus imshenetskii</i> (AJ784993)            | <i>Bacteroidetes</i>          | 87.82           | ● <i>Bacteroidetes</i>                     | 737                        |
| 25                         | 2                           |                               |            | <i>Alkaliflexus imshenetskii</i> (AJ784993)            | <i>Bacteroidetes</i>          | 87.82           | ● <i>Bacteroidetes</i>                     | 737                        |
| 26                         | 9                           | 1                             |            | <i>Propionivibrio limicola</i> (AJ307983)              | <i>Proteobacteria</i> (Beta)  | 95.49           | ● <i>Proteobacteria</i> (Beta)             | 732                        |
| 27                         | 1                           |                               |            | <i>Methylocystis heyeri</i> (AM283543)                 | <i>Proteobacteria</i> (Alpha) | 97.43           | ● <i>Proteobacteria</i> (Alpha)            | 779                        |
| 28                         | 1                           |                               |            | <i>Melioribacter roseus</i> (CP003557)                 | <i>Chlorobi</i>               | 82.33           | ●Unclassified                              | 765                        |
| 29                         | 1                           |                               |            | <i>Telmatobacter bradus</i> (AM887760)                 | <i>Acidobacteria</i>          | 97.19           | ● <i>Acidobacteria</i>                     | 747                        |
| 30                         | 1                           |                               |            | <i>Acidicapsa ligni</i> (EU780204)                     | <i>Acidobacteria</i>          | 95.56           | ● <i>Acidobacteria</i>                     | 675                        |
| 31                         | 2                           |                               |            | <i>Telmatobacter bradus</i> (AM887760)                 | <i>Acidobacteria</i>          | 96.16           | ● <i>Acidobacteria</i>                     | 756                        |

**Table S1.** Phylogenetic affiliations of 16S rRNA gene clones (*Continued*)

| Clone-<br>phylotype<br>No. | Total no. of clones         |                               |            | Related authentic species                         |                               |                 | Phylum (Class)<br>classified by CLASSIFIER | Compared<br>length<br>(bp) |
|----------------------------|-----------------------------|-------------------------------|------------|---------------------------------------------------|-------------------------------|-----------------|--------------------------------------------|----------------------------|
|                            | <i>Iris<br/>pseudacorus</i> | <i>Scirpus<br/>juncooides</i> | Pond water | Specis (Accession no.)                            | Phylum (Class)                | Identity<br>(%) |                                            |                            |
| 32                         | 1                           |                               |            | <i>Terrimicrobium sacchariphilum</i> (GU129926)   | <i>Verrucomicrobia</i>        | 85.28           | ● <i>Verrucomicrobia</i>                   | 673                        |
| 33                         | 1                           |                               |            | <i>Skermanella aerolata</i> (DQ672568)            | <i>Proteobacteria</i> (Alpha) | 93.47           | ● <i>Proteobacteria</i> (Alpha)            | 704                        |
| 34                         | 1                           |                               |            | <i>Fimbriimonas ginsengisoli</i> (GQ339893)       | <i>Armatimonadetes</i>        | 88.38           | ● <i>Armatimonadetes</i>                   | 749                        |
| 35                         | 1                           |                               |            | <i>Sporotalea propionica</i> (AM258975)           | <i>Firmicutes</i>             | 93.81           | ● <i>Firmicutes</i>                        | 743                        |
| 36                         | 1                           |                               |            | <i>Spirochaeta asiatica</i> (X93926)              | <i>Spirochaetes</i>           | 86.85           | ● <i>Spirochaetes</i>                      | 732                        |
| 37                         | 1                           |                               |            | <i>Spirochaeta halophila</i> (M88722)             | <i>Spirochaetes</i>           | 86.34           | ● <i>Spirochaetes</i>                      | 776                        |
| 38                         | 2                           |                               |            | <i>Haliangium tepidum</i> (AB062751)              | <i>Proteobacteria</i> (Delta) | 85.35           | ● <i>Proteobacteria</i> (Delta)            | 745                        |
| 39                         | 1                           |                               |            | <i>Uliginosibacterium gangwonense</i> (DQ665916)  | <i>Proteobacteria</i> (Beta)  | 99.13           | ● <i>Proteobacteria</i> (Beta)             | 808                        |
| 40                         | 1                           |                               |            | <i>Dechloromonas agitata</i> (AF047462)           | <i>Proteobacteria</i> (Beta)  | 98.27           | ● <i>Proteobacteria</i> (Beta)             | 750                        |
| 41                         | 1                           |                               |            | <i>Akkermansia muciniphila</i> (CP001071)         | <i>Verrucomicrobia</i>        | 83.14           | ● <i>Verrucomicrobia</i>                   | 731                        |
| 42                         | 1                           |                               |            | <i>Derxia gummosa</i> (AB089482)                  | <i>Proteobacteria</i> (Beta)  | 94.12           | ● <i>Proteobacteria</i> (Beta)             | 748                        |
| 43                         | 1                           |                               |            | <i>Anaerosinus glycerini</i> (AJ010960)           | <i>Firmicutes</i>             | 90.90           | ● <i>Firmicutes</i>                        | 759                        |
| 44                         | 1                           |                               |            | <i>Luteolibacter cuticulihirudinis</i> (JQ429496) | <i>Verrucomicrobia</i>        | 95.34           | ● <i>Verrucomicrobia</i>                   | 772                        |
| 45                         | 1                           |                               |            | <i>Brevifollis gellanylcticus</i> (AB552872)      | <i>Verrucomicrobia</i>        | 82.73           | ● <i>Verrucomicrobia</i>                   | 742                        |
| 46                         | 1                           |                               |            | <i>Dictyoglomus turgidum</i> (CP001251)           | <i>Chloroflexi</i>            | 81.85           | ●Unclassified                              | 770                        |
| 47                         | 1                           |                               |            | <i>Rhodoblastus sphagnicola</i> (AM040096)        | <i>Proteobacteria</i> (Alpha) | 98.52           | ● <i>Proteobacteria</i> (Alpha)            | 744                        |
| 48                         | 1                           |                               |            | <i>Georgfuchsia toluolica</i> (EF219370)          | <i>Proteobacteria</i> (Beta)  | 94.72           | ● <i>Proteobacteria</i> (Beta)             | 757                        |
| 49                         | 1                           |                               |            | <i>Georgfuchsia toluolica</i> (EF219370)          | <i>Proteobacteria</i> (Beta)  | 94.09           | ● <i>Proteobacteria</i> (Beta)             | 761                        |
| 50                         | 1                           |                               |            | <i>Georgfuchsia toluolica</i> (EF219370)          | <i>Proteobacteria</i> (Beta)  | 95.51           | ● <i>Proteobacteria</i> (Beta)             | 780                        |
| 51                         | 1                           | 1                             |            | <i>Prosthecomicrobium hirschii</i> (HM037994)     | <i>Proteobacteria</i> (Alpha) | 94.49           | ● <i>Proteobacteria</i> (Alpha)            | 762                        |
| 52                         | 1                           |                               | 1          | <i>Limnohabitans planktonicus</i> (FM165535)      | <i>Proteobacteria</i> (Beta)  | 97.74           | ● <i>Proteobacteria</i> (Beta)             | 753                        |
| 53                         | 1                           | 1                             | 1          | <i>Sediminibacterium goheungense</i> (JN674641)   | <i>Bacteroidetes</i>          | 94.19           | ● <i>Bacteroidetes</i>                     | 689                        |
| 54                         | 1                           | 1                             |            | <i>Cystobacter miniatus</i> (DQ768111)            | <i>Proteobacteria</i> (Delta) | 94.78           | ● <i>Proteobacteria</i> (Delta)            | 672                        |
| 55                         | 1                           |                               |            | <i>Methyloferula stellata</i> (ARWA01000001)      | <i>Proteobacteria</i> (Alpha) | 97.27           | ● <i>Proteobacteria</i> (Alpha)            | 697                        |
| 56                         | 1                           |                               |            | <i>Microlunatus panaciterrae</i> (AB271051)       | <i>Actinobacteria</i>         | 94.81           | ● <i>Actinobacteria</i>                    | 696                        |
| 57                         | 1                           |                               |            | <i>Aciditerrimonas ferrireducens</i> (AB517669)   | <i>Actinobacteria</i>         | 89.21           | ● <i>Actinobacteria</i>                    | 687                        |
| 58                         | 1                           |                               |            | <i>Geothrix fermentans</i> (U41563)               | <i>Acidobacteria</i>          | 94.35           | ● <i>Acidobacteria</i>                     | 690                        |
| 59                         | 1                           |                               |            | <i>Georgfuchsia toluolica</i> (EF219370)          | <i>Proteobacteria</i> (Beta)  | 95.58           | ● <i>Proteobacteria</i> (Beta)             | 679                        |
| 60                         | 1                           |                               |            | <i>Marinifilum fragile</i> (FJ394546)             | <i>Bacteroidetes</i>          | 84.72           | ● <i>Bacteroidetes</i>                     | 690                        |
| 61                         | 1                           |                               |            | <i>Georgfuchsia toluolica</i> (EF219370)          | <i>Proteobacteria</i> (Beta)  | 94.77           | ● <i>Proteobacteria</i> (Beta)             | 593                        |
| 62                         | 1                           |                               |            | <i>Alkaliflexus imshenetskii</i> (AJ784993)       | <i>Bacteroidetes</i>          | 87.43           | ● <i>Bacteroidetes</i>                     | 682                        |

**Table S1.** Phylogenetic affiliations of 16S rRNA gene clones (*Continued*)

| Clone-<br>phylotype<br>No. | Total no. of clones         |                               |            | Related authentic species                                            |                               |                 | Phylum (Class)<br>classified by CLASSIFIER | Compared<br>length<br>(bp) |
|----------------------------|-----------------------------|-------------------------------|------------|----------------------------------------------------------------------|-------------------------------|-----------------|--------------------------------------------|----------------------------|
|                            | <i>Iris<br/>pseudacorus</i> | <i>Scirpus<br/>juncooides</i> | Pond water | Specis (Accession no.)                                               | Phylum (Class)                | Identity<br>(%) |                                            |                            |
| 63                         | 1                           |                               |            | <i>Clostridium tertium</i> (Y18175)                                  | <i>Firmicutes</i>             | 87.81           | ● <i>Firmicutes</i>                        | 685                        |
| 64                         | 1                           |                               |            | <i>Paludibaculum fermentans</i> (KJ461654)                           | <i>Acidobacteria</i>          | 90.94           | ● <i>Acidobacteria</i>                     | 684                        |
| 65                         | 1                           |                               |            | <i>Solitalea koreensis</i> (EU787448)                                | <i>Bacteroidetes</i>          | 82.02           | ● <i>Bacteroidetes</i>                     | 685                        |
| 66                         | 1                           |                               |            | <i>Telmatobacter bradus</i> (AM887760)                               | <i>Acidobacteria</i>          | 97.82           | ● <i>Acidobacteria</i>                     | 687                        |
| 67                         | 1                           |                               |            | <i>Methylocystis bryophila</i> (FN422003)                            | <i>Proteobacteria</i> (Alpha) | 94.89           | ● <i>Proteobacteria</i> (Alpha)            | 685                        |
| 68                         | 1                           |                               |            | <i>Phaeospirillum tilakii</i> (FN675262)                             | <i>Proteobacteria</i> (Alpha) | 98.13           | ● <i>Proteobacteria</i> (Alpha)            | 644                        |
| 69                         | 2                           |                               |            | <i>Spirochaeta asiatica</i> (X93926)                                 | <i>Spirochaetes</i>           | 88.39           | ● <i>Spirochaetes</i>                      | 690                        |
| 70                         |                             | 1                             |            | <i>Pirellula staleyi</i> (CP001848)                                  | <i>Planctomycetes</i>         | 86.25           | ● <i>Planctomycetes</i>                    | 823                        |
| 71                         |                             | 3                             |            | <i>Pseudanabaena tremula</i> (AF218371)                              | <i>Cyanobacteria</i>          | 90.93           | ● <i>Cyanobacteria</i>                     | 748                        |
| 72                         |                             | 1                             |            | <i>Geobacter sulfurreducens</i> subsp. <i>ethanolicus</i> (AB762695) | <i>Proteobacteria</i> (Delta) | 77.78           | ●Unclassified                              | 696                        |
| 73                         |                             | 2                             |            | <i>Sphaerotilus natans</i> subsp. <i>sulfidivorans</i> (FJ871054)    | <i>Proteobacteria</i> (Beta)  | 98.22           | ● <i>Proteobacteria</i> (Beta)             | 674                        |
| 74                         |                             | 1                             |            | <i>Povalibacter uvarum</i> (AB548216)                                | <i>Proteobacteria</i> (Gamma) | 91.26           | ● <i>Proteobacteria</i> (Gamma)            | 698                        |
| 75                         |                             | 2                             |            | <i>Rubrivivax gelatinosus</i> (D16213)                               | <i>Proteobacteria</i> (Beta)  | 97.16           | ● <i>Proteobacteria</i> (Beta)             | 668                        |
| 76                         |                             | 1                             |            | <i>Cupriavidus gilardii</i> (EU024163)                               | <i>Proteobacteria</i> (Beta)  | 90.10           | ● <i>Proteobacteria</i> (Beta)             | 828                        |
| 77                         |                             | 1                             |            | <i>Ideonella azotifigens</i> (EU542576)                              | <i>Proteobacteria</i> (Beta)  | 98.28           | ● <i>Proteobacteria</i> (Beta)             | 820                        |
| 78                         |                             | 1                             |            | <i>Ferriphaseelus amnicola</i> (AB720115)                            | <i>Proteobacteria</i> (Beta)  | 93.63           | ● <i>Proteobacteria</i> (Beta)             | 738                        |
| 79                         |                             | 1                             |            | <i>Chelativorans multitrophicus</i> (EF457243)                       | <i>Proteobacteria</i> (Alpha) | 91.12           | ● <i>Proteobacteria</i> (Alpha)            | 743                        |
| 80                         |                             | 2                             |            | <i>Hoeflea alexandrii</i> (AJ786600)                                 | <i>Proteobacteria</i> (Alpha) | 91.64           | ● <i>Proteobacteria</i> (Alpha)            | 801                        |
| 81                         |                             | 6                             |            | <i>Ideonella dechloratans</i> (X72724)                               | <i>Proteobacteria</i> (Beta)  | 97.08           | ● <i>Proteobacteria</i> (Beta)             | 828                        |
| 82                         |                             | 1                             |            | <i>Rubrivivax benzoatilyticus</i> (AEWG01000018)                     | <i>Proteobacteria</i> (Beta)  | 98.56           | ● <i>Proteobacteria</i> (Beta)             | 695                        |
| 83                         |                             | 3                             |            | <i>Paludibaculum fermentans</i> (KJ461654)                           | <i>Acidobacteria</i>          | 91.64           | ● <i>Acidobacteria</i>                     | 685                        |
| 84                         |                             | 1                             |            | <i>Gemmata obscuriglobus</i> (ABGO01000325)                          | <i>Planctomycetes</i>         | 86.10           | ● <i>Planctomycetes</i>                    | 705                        |
| 85                         |                             | 1                             |            | <i>Paludibaculum fermentans</i> (KJ461654)                           | <i>Acidobacteria</i>          | 91.09           | ● <i>Acidobacteria</i>                     | 694                        |
| 86                         |                             | 1                             |            | <i>Aquincola tertiaricarbonis</i> (DQ656489)                         | <i>Proteobacteria</i> (Beta)  | 97.03           | ● <i>Proteobacteria</i> (Beta)             | 708                        |
| 87                         |                             | 2                             |            | <i>Piscinibacter aquaticus</i> (DQ664244)                            | <i>Proteobacteria</i> (Beta)  | 99.69           | ● <i>Proteobacteria</i> (Beta)             | 643                        |
| 88                         |                             | 1                             |            | <i>Piscinibacter aquaticus</i> (DQ664244)                            | <i>Proteobacteria</i> (Beta)  | 99.15           | ● <i>Proteobacteria</i> (Beta)             | 704                        |
| 89                         |                             | 1                             |            | <i>Methylocystis bryophila</i> (FN422003)                            | <i>Proteobacteria</i> (Alpha) | 94.56           | ● <i>Proteobacteria</i> (Alpha)            | 699                        |
| 90                         |                             | 2                             |            | <i>Hyphomicrobium nitrativorans</i> (CP006912)                       | <i>Proteobacteria</i> (Alpha) | 91.69           | ● <i>Proteobacteria</i> (Alpha)            | 710                        |
| 91                         |                             | 1                             |            | <i>Paludibaculum fermentans</i> (KJ461654)                           | <i>Acidobacteria</i>          | 89.96           | ● <i>Acidobacteria</i>                     | 737                        |
| 92                         |                             | 1                             |            | <i>Ideonella azotifigens</i> (EU542576)                              | <i>Proteobacteria</i> (Beta)  | 98.34           | ● <i>Proteobacteria</i> (Beta)             | 728                        |
| 93                         |                             | 1                             |            | <i>Lewinella cohaerens</i> (ARBR01000027)                            | <i>Bacteroidetes</i>          | 82.78           | ● <i>Bacteroidetes</i>                     | 700                        |

**Table S1.** Phylogenetic affiliations of 16S rRNA gene clones (*Continued*)

| Clone-<br>phylotype<br>No. | Total no. of clones         |                              |            | Related authentic species                          |                               |                 | Phylum (Class)<br>classified by CLASSIFIER | Compared<br>length<br>(bp) |
|----------------------------|-----------------------------|------------------------------|------------|----------------------------------------------------|-------------------------------|-----------------|--------------------------------------------|----------------------------|
|                            | <i>Iris<br/>pseudacorus</i> | <i>Scirpus<br/>juncoides</i> | Pond water | Specis (Accession no.)                             | Phylum (Class)                | Identity<br>(%) |                                            |                            |
| 94                         |                             | 1                            |            | <i>Terrimicrobium sacchariphilum</i> (GU129926)    | <i>Verrucomicrobia</i>        | 90.61           | ● <i>Verrucomicrobia</i>                   | 723                        |
| 95                         |                             | 1                            |            | <i>Granulicella cerasi</i> (AB548308)              | <i>Acidobacteria</i>          | 82.86           | ● <i>Acidobacteria</i>                     | 829                        |
| 96                         |                             | 1                            |            | <i>Bryobacter aggregatus</i> (AM162405)            | <i>Acidobacteria</i>          | 90.58           | ● <i>Acidobacteria</i>                     | 690                        |
| 97                         |                             | 1                            |            | <i>Methyloferula stellata</i> (ARWA01000001)       | <i>Proteobacteria</i> (Alpha) | 97.10           | ● <i>Proteobacteria</i> (Delta)            | 689                        |
| 98                         |                             | 1                            |            | <i>Coxiella burnetii</i> (CP000890)                | <i>Proteobacteria</i> (Gamma) | 89.90           | ● <i>Proteobacteria</i> (Gamma)            | 736                        |
| 99                         |                             | 1                            |            | <i>Bradyrhizobium liaoningense</i> (AF208513)      | <i>Proteobacteria</i> (Alpha) | 99.57           | ● <i>Proteobacteria</i> (Delta)            | 690                        |
| 100                        |                             | 1                            |            | <i>Bryobacter aggregatus</i> (AM162405)            | <i>Acidobacteria</i>          | 90.81           | ● <i>Acidobacteria</i>                     | 730                        |
| 101                        |                             | 2                            |            | <i>Phormidium pristleyi</i> (AY493582)             | <i>Cyanobacteria</i>          | 93.25           | ● <i>Cyanobacteria</i>                     | 712                        |
| 102                        |                             | 1                            |            | <i>Sandaracinus amylolyticus</i> (HQ540311)        | <i>Proteobacteria</i> (Delta) | 90.27           | ● <i>Proteobacteria</i> (Delta)            | 700                        |
| 103                        |                             | 1                            |            | <i>Acidisphaera rubrifaciens</i> (D86512)          | <i>Proteobacteria</i> (Alpha) | 94.13           | ● <i>Proteobacteria</i> (Alpha)            | 716                        |
| 104                        |                             | 1                            |            | <i>Paludibaculum fermentans</i> (KJ461654)         | <i>Acidobacteria</i>          | 91.31           | ● <i>Acidobacteria</i>                     | 702                        |
| 105                        |                             | 2                            |            | <i>Aridibacter kavangonensis</i> (KF245633)        | <i>Acidobacteria</i>          | 84.65           | ● <i>Acidobacteria</i>                     | 711                        |
| 106                        |                             | 1                            |            | <i>Bryobacter aggregatus</i> (AM162405)            | <i>Acidobacteria</i>          | 90.86           | ● <i>Acidobacteria</i>                     | 700                        |
| 107                        |                             | 1                            |            | <i>Blastopirellula cremea</i> (JF748733)           | <i>Planctomycetes</i>         | 85.61           | ● <i>Planctomycetes</i>                    | 701                        |
| 108                        |                             | 1                            |            | <i>Ilumatobacter fluminis</i> (AB360343)           | <i>Actinobacteria</i>         | 89.53           | ● <i>Actinobacteria</i>                    | 697                        |
| 109                        |                             | 1                            |            | <i>Methyloversatilis thermotolerans</i> (KC782839) | <i>Proteobacteria</i> (Beta)  | 94.76           | ● <i>Proteobacteria</i> (Beta)             | 706                        |
| 110                        |                             | 1                            |            | <i>Rubrivivax gelatinosus</i> (D16213)             | <i>Proteobacteria</i> (Beta)  | 96.99           | ● <i>Proteobacteria</i> (Beta)             | 698                        |
| 111                        |                             | 1                            |            | <i>Arthronema africanum</i> (AB115966)             | <i>Cyanobacteria</i>          | 89.75           | ● <i>Cyanobacteria</i>                     | 693                        |
| 112                        |                             | 1                            |            | <i>Ignavibacterium album</i> (CP003418)            | <i>Chlorobi</i>               | 83.90           | ● Unclassified                             | 708                        |
| 113                        |                             | 1                            |            | <i>Steroidobacter denitrificans</i> (EF605262)     | <i>Proteobacteria</i> (Gamma) | 91.19           | ● <i>Proteobacteria</i> (Gamma)            | 715                        |
| 114                        |                             | 1                            |            | <i>Devosia albobilva</i> (EF433460)                | <i>Proteobacteria</i> (Alpha) | 91.32           | ● <i>Proteobacteria</i> (Alpha)            | 703                        |
| 115                        |                             | 1                            |            | <i>Paucimonas lemoignei</i> (X92555)               | <i>Proteobacteria</i> (Beta)  | 94.59           | ● <i>Proteobacteria</i> (Beta)             | 722                        |
| 116                        |                             | 1                            |            | <i>Anaeromyxobacter dehalogenans</i> (AF382396)    | <i>Proteobacteria</i> (Delta) | 95.87           | ● <i>Proteobacteria</i> (Delta)            | 703                        |
| 117                        |                             | 1                            |            | <i>Aciditerrimonas ferrireducens</i> (AB517669)    | <i>Actinobacteria</i>         | 88.90           | ● <i>Actinobacteria</i>                    | 695                        |
| 118                        |                             | 2                            |            | <i>Paludibaculum fermentans</i> (KJ461654)         | <i>Acidobacteria</i>          | 91.31           | ● <i>Acidobacteria</i>                     | 679                        |
| 119                        |                             | 1                            |            | <i>Skermanella aerolata</i> (DQ672568)             | <i>Proteobacteria</i> (Alpha) | 93.00           | ● <i>Proteobacteria</i> (Alpha)            | 700                        |
| 120                        |                             | 1                            |            | <i>Aquincola tertiaricarbonis</i> (DQ656489)       | <i>Proteobacteria</i> (Beta)  | 97.07           | ● <i>Proteobacteria</i> (Beta)             | 717                        |
| 121                        |                             | 1                            |            | <i>Melittangium alboraceum</i> (AJ233907)          | <i>Proteobacteria</i> (Delta) | 93.73           | ● <i>Proteobacteria</i> (Delta)            | 686                        |
| 122                        |                             | 1                            | 1          | <i>Chitinophaga ginsengisoli</i> (AB245374)        | <i>Bacteroidetes</i>          | 87.57           | ● <i>Bacteroidetes</i>                     | 694                        |
| 123                        |                             | 1                            |            | <i>Gemmobacter tilapiae</i> (HQ111526)             | <i>Proteobacteria</i> (Alpha) | 97.66           | ● <i>Proteobacteria</i> (Alpha)            | 684                        |
| 124                        |                             | 1                            |            | <i>Haliangium tepidum</i> (AB062751)               | <i>Proteobacteria</i> (Delta) | 89.60           | ● <i>Proteobacteria</i> (Delta)            | 693                        |

**Table S1.** Phylogenetic affiliations of 16S rRNA gene clones (*Continued*)

| Clone-<br>phylotype<br>No. | Total no. of clones         |                               |            | Related authentic species                       |                               |                 | Phylum (Class)<br>classified by CLASSIFIER | Compared<br>length<br>(bp) |
|----------------------------|-----------------------------|-------------------------------|------------|-------------------------------------------------|-------------------------------|-----------------|--------------------------------------------|----------------------------|
|                            | <i>Iris<br/>pseudacorus</i> | <i>Scirpus<br/>juncooides</i> | Pond water | Specis (Accession no.)                          | Phylum (Class)                | Identity<br>(%) |                                            |                            |
| 125                        |                             | 2                             |            | <i>Bryobacter aggregatus</i> (AM162405)         | <i>Acidobacteria</i>          | 90.40           | ● <i>Acidobacteria</i>                     | 677                        |
| 126                        |                             | 1                             |            | <i>Bryobacter aggregatus</i> (AM162405)         | <i>Acidobacteria</i>          | 91.73           | ● <i>Acidobacteria</i>                     | 701                        |
| 127                        |                             | 1                             |            | <i>Haliangium tepidum</i> (AB062751)            | <i>Proteobacteria</i> (Delta) | 90.25           | ● <i>Proteobacteria</i> (Delta)            | 680                        |
| 128                        |                             | 1                             |            | <i>Armatimonas rosea</i> (AB529679)             | <i>Armatimonadetes</i>        | 88.69           | ● <i>Armatimonadetes</i>                   | 677                        |
| 129                        |                             | 1                             |            | <i>Thauera mechernichensis</i> (Y17590)         | <i>Proteobacteria</i> (Beta)  | 89.97           | ● <i>Proteobacteria</i> (Beta)             | 689                        |
| 130                        |                             | 1                             |            | <i>Bradyrhizobium daqingense</i> (HQ231274)     | <i>Proteobacteria</i> (Alpha) | 99.71           | ● <i>Proteobacteria</i> (Alpha)            | 699                        |
| 131                        |                             | 1                             |            | <i>Ignavibacterium album</i> (CP003418)         | <i>Chlorobi</i>               | 84.66           | ● Unclassified                             | 691                        |
| 132                        |                             | 1                             |            | <i>Paludibaculum fermentans</i> (KJ461654)      | <i>Acidobacteria</i>          | 92.30           | ● <i>Acidobacteria</i>                     | 649                        |
| 133                        |                             | 1                             |            | <i>Dongia mobilis</i> (FJ455532)                | <i>Proteobacteria</i> (Alpha) | 88.65           | ● <i>Proteobacteria</i> (Alpha)            | 696                        |
| 134                        |                             | 1                             |            | <i>Terrimicrobium sacchariphilum</i> (GU129926) | <i>Verrucomicrobia</i>        | 83.95           | ● <i>Verrucomicrobia</i>                   | 694                        |
| 135                        |                             | 1                             |            | <i>Azoarcus buckelii</i> (AJ315676)             | <i>Proteobacteria</i> (Beta)  | 93.00           | ● <i>Proteobacteria</i> (Beta)             | 686                        |
| 136                        |                             | 1                             |            | <i>Nitrobacter vulgaris</i> (AM114522)          | <i>Proteobacteria</i> (Alpha) | 99.13           | ● <i>Proteobacteria</i> (Alpha)            | 686                        |
| 137                        |                             | 1                             |            | <i>Aquicella siphonis</i> (AY359283)            | <i>Proteobacteria</i> (Gamma) | 92.43           | ● <i>Proteobacteria</i> (Gamma)            | 687                        |
| 138                        |                             | 1                             |            | <i>Ilumatobacter fluminis</i> (AB360343)        | <i>Actinobacteria</i>         | 91.69           | ● <i>Actinobacteria</i>                    | 686                        |
| 139                        |                             | 1                             |            | <i>Quadrisphaera granulorum</i> (AY831385)      | <i>Actinobacteria</i>         | 96.63           | ● <i>Actinobacteria</i>                    | 683                        |
| 140                        |                             | 1                             |            | <i>Devosia albogilva</i> (EF433460)             | <i>Proteobacteria</i> (Alpha) | 96.10           | ● <i>Proteobacteria</i> (Alpha)            | 693                        |
| 141                        |                             | 1                             |            | <i>Ideonella azotifigens</i> (EU542576)         | <i>Proteobacteria</i> (Beta)  | 97.82           | ● <i>Proteobacteria</i> (Beta)             | 692                        |
| 142                        |                             | 1                             |            | <i>Desulfovibrio butyratiphilus</i> (AB303305)  | "Latescibacteria"             | 81.84           | ● "Latescibacteria"                        | 685                        |
| 143                        |                             |                               | 4          | <i>Flavobacterium macrobrachii</i> (FJ593904)   | <i>Bacteroidetes</i>          | 97.12           | ● <i>Bacteroidetes</i>                     | 764                        |
| 144                        |                             |                               | 1          | <i>Formivibrio citricus</i> (Y17602)            | <i>Proteobacteria</i> (Beta)  | 95.02           | ● <i>Proteobacteria</i> (Beta)             | 705                        |
| 145                        |                             |                               | 8          | <i>Limnohabitans curvus</i> (AJ938026)          | <i>Proteobacteria</i> (Beta)  | 97.42           | ● <i>Proteobacteria</i> (Beta)             | 776                        |
| 146                        |                             |                               | 2          | <i>Limnohabitans parvus</i> (FM165536)          | <i>Proteobacteria</i> (Beta)  | 97.36           | ● <i>Proteobacteria</i> (Beta)             | 759                        |
| 147                        |                             |                               | 1          | <i>Limnohabitans curvus</i> (AJ938026)          | <i>Proteobacteria</i> (Beta)  | 97.07           | ● <i>Proteobacteria</i> (Beta)             | 752                        |
| 148                        |                             |                               | 2          | <i>Limnohabitans planktonicus</i> (FM165535)    | <i>Proteobacteria</i> (Beta)  | 99.08           | ● <i>Proteobacteria</i> (Beta)             | 763                        |
| 149                        |                             |                               | 1          | <i>Limnohabitans curvus</i> (AJ938026)          | <i>Proteobacteria</i> (Beta)  | 97.71           | ● <i>Proteobacteria</i> (Beta)             | 743                        |
| 150                        |                             |                               | 1          | <i>Curvibacter delicatus</i> (AF078756)         | <i>Proteobacteria</i> (Beta)  | 97.50           | ● <i>Proteobacteria</i> (Beta)             | 760                        |
| 151                        |                             |                               | 10         | <i>Limnohabitans curvus</i> (AJ938026)          | <i>Proteobacteria</i> (Beta)  | 97.74           | ● <i>Proteobacteria</i> (Beta)             | 752                        |
| 152                        |                             |                               | 3          | <i>Curvibacter delicatus</i> (AF078756)         | <i>Proteobacteria</i> (Beta)  | 97.61           | ● <i>Proteobacteria</i> (Beta)             | 753                        |
| 153                        |                             |                               | 1          | <i>Curvibacter delicatus</i> (AF078756)         | <i>Proteobacteria</i> (Beta)  | 98.62           | ● <i>Proteobacteria</i> (Beta)             | 654                        |
| 154                        |                             |                               | 1          | <i>Curvibacter delicatus</i> (AF078756)         | <i>Proteobacteria</i> (Beta)  | 97.57           | ● <i>Proteobacteria</i> (Beta)             | 699                        |
| 155                        |                             |                               | 1          | <i>Hydrogenophaga caeni</i> (DQ372983)          | <i>Proteobacteria</i> (Beta)  | 96.37           | ● <i>Proteobacteria</i> (Beta)             | 689                        |

**Table S1.** Phylogenetic affiliations of 16S rRNA gene clones (*Continued*)

| Clone-<br>phylotype<br>No. | Total no. of clones         |                               |            | Related authentic species                                                 |                               |                 | Phylum (Class)<br>classified by CLASSIFIER | Compared<br>length<br>(bp) |
|----------------------------|-----------------------------|-------------------------------|------------|---------------------------------------------------------------------------|-------------------------------|-----------------|--------------------------------------------|----------------------------|
|                            | <i>Iris<br/>pseudacorus</i> | <i>Scirpus<br/>juncooides</i> | Pond water | Specis (Accession no.)                                                    | Phylum (Class)                | Identity<br>(%) |                                            |                            |
| 156                        |                             |                               | 1          | <i>Hydrogenophaga caeni</i> (DQ372983)                                    | <i>Proteobacteria</i> (Beta)  | 96.37           | ● <i>Proteobacteria</i> (Beta)             | 775                        |
| 157                        |                             |                               | 1          | <i>Methylotenera mobilis</i> (CP001672)                                   | <i>Proteobacteria</i> (Beta)  | 94.81           | ● <i>Proteobacteria</i> (Beta)             | 693                        |
| 158                        |                             |                               | 1          | <i>Methylophilus methylotrophus</i> (AB193724)                            | <i>Proteobacteria</i> (Beta)  | 99.60           | ● <i>Proteobacteria</i> (Beta)             | 741                        |
| 159                        |                             |                               | 2          | <i>Sediminibacterium goheungense</i> (JN674641)                           | <i>Bacteroidetes</i>          | 96.30           | ● <i>Bacteroidetes</i>                     | 703                        |
| 160                        |                             |                               | 2          | <i>Sediminibacterium goheungense</i> (JN674641)                           | <i>Bacteroidetes</i>          | 95.92           | ● <i>Bacteroidetes</i>                     | 736                        |
| 161                        |                             |                               | 5          | <i>Intrasporangium chromatireducens</i> (AWQS01000147)                    | <i>Actinobacteria</i>         | 89.84           | ● <i>Actinobacteria</i>                    | 738                        |
| 162                        |                             |                               | 2          | <i>Cetobacterium somerae</i> (AJ438155)                                   | <i>Fusobacteria</i>           | 99.22           | ● <i>Fusobacteria</i>                      | 771                        |
| 163                        |                             |                               | 1          | <i>Dechloromonas hortensis</i> (AY277621)                                 | <i>Proteobacteria</i> (Beta)  | 97.55           | ● <i>Proteobacteria</i> (Beta)             | 736                        |
| 164                        |                             |                               | 1          | <i>Phenylobacterium composti</i> (EU022524)                               | <i>Proteobacteria</i> (Alpha) | 87.32           | ● <i>Proteobacteria</i> (Alpha)            | 703                        |
| 165                        |                             |                               | 2          | <i>Pseudarcicella hirudinis</i> (HE585218)                                | <i>Bacteroidetes</i>          | 90.96           | ● <i>Bacteroidetes</i>                     | 697                        |
| 166                        |                             |                               | 1          | <i>Solitalea canadensis</i> (AGSC01000046)                                | <i>Bacteroidetes</i>          | 85.34           | ● <i>Bacteroidetes</i>                     | 771                        |
| 167                        |                             |                               | 1          | <i>Haliscomenobacter calcifugiens</i> (AJ786327)                          | <i>Bacteroidetes</i>          | 85.57           | ● <i>Bacteroidetes</i>                     | 673                        |
| 168                        |                             |                               | 1          | <i>Luteibaculum oceani</i> (KC169812)                                     | <i>Bacteroidetes</i>          | 86.29           | ● <i>Bacteroidetes</i>                     | 715                        |
| 169                        |                             |                               | 1          | <i>Tabrizicola aquatica</i> (HQ392507)                                    | <i>Proteobacteria</i> (Alpha) | 97.82           | ● <i>Proteobacteria</i> (Alpha)            | 733                        |
| 170                        |                             |                               | 1          | <i>Ferruginibacter alkalilentus</i> (FJ263934)                            | <i>Bacteroidetes</i>          | 94.92           | ● <i>Bacteroidetes</i>                     | 729                        |
| 171                        |                             |                               | 1          | <i>Tabrizicola aquatica</i> (HQ392507)                                    | <i>Proteobacteria</i> (Alpha) | 97.94           | ● <i>Proteobacteria</i> (Alpha)            | 679                        |
| 172                        |                             |                               | 3          | <i>Pseudarcicella hirudinis</i> (HE585218)                                | <i>Bacteroidetes</i>          | 91.33           | ● <i>Bacteroidetes</i>                     | 750                        |
| 173                        |                             |                               | 1          | <i>Microcystis ichthyoblabe</i> (AB035550)                                | <i>Cyanobacteria</i>          | 98.96           | ● <i>Cyanobacteria</i>                     | 670                        |
| 174                        |                             |                               | 2          | <i>Polynucleobacter necessarius</i> subsp. <i>asymbioticus</i> (CP000655) | <i>Proteobacteria</i> (Beta)  | 99.86           | ● <i>Proteobacteria</i> (Beta)             | 738                        |
| 175                        |                             |                               | 1          | <i>Pseudarcicella hirudinis</i> (HE585218)                                | <i>Bacteroidetes</i>          | 90.95           | ● <i>Bacteroidetes</i>                     | 696                        |
| 176                        |                             |                               | 1          | <i>Limnohabitans planktonicus</i> (FM165535)                              | <i>Proteobacteria</i> (Beta)  | 94.47           | ● <i>Proteobacteria</i> (Beta)             | 705                        |
| 177                        |                             |                               | 1          | <i>Polynucleobacter necessarius</i> subsp. <i>asymbioticus</i> (CP000655) | <i>Proteobacteria</i> (Beta)  | 99.56           | ● <i>Proteobacteria</i> (Beta)             | 676                        |
| 178                        |                             |                               | 1          | <i>Polynucleobacter necessarius</i> subsp. <i>asymbioticus</i> (CP000655) | <i>Proteobacteria</i> (Beta)  | 100             | ● <i>Proteobacteria</i> (Beta)             | 677                        |
| 179                        |                             |                               | 1          | <i>Thiopfundum lithotrophicum</i> (AB468957)                              | <i>Proteobacteria</i> (Gamma) | 93.84           | ● <i>Proteobacteria</i> (Gamma)            | 699                        |
| 180                        |                             |                               | 1          | <i>Sediminibacterium goheungense</i> (JN674641)                           | <i>Bacteroidetes</i>          | 96.04           | ● <i>Bacteroidetes</i>                     | 733                        |
| 181                        |                             |                               | 1          | <i>Gloeobacter violaceus</i> (BA000045)                                   | <i>Cyanobacteria</i>          | 82.60           | ● <i>Cyanobacteria</i>                     | 762                        |
| 182                        |                             |                               | 1          | <i>Methylotenera mobilis</i> (DQ287786)                                   | <i>Proteobacteria</i> (Beta)  | 98.24           | ● <i>Proteobacteria</i> (Beta)             | 626                        |
| 183                        |                             |                               | 1          | <i>Desulfonatratrum lacustre</i> (AF418171)                               | <i>Proteobacteria</i> (Delta) | 80.35           | ● <i>Proteobacteria</i> (Unclassified)     | 684                        |
| 184                        |                             |                               | 1          | <i>Haematobacter massiliensis</i> (DQ342309)                              | <i>Proteobacteria</i> (Alpha) | 98.26           | ● <i>Proteobacteria</i> (Alpha)            | 689                        |
| 185                        |                             |                               | 1          | <i>Calothrix desertica</i> (AF132779)                                     | <i>Cyanobacteria</i>          | 98.17           | ● <i>Cyanobacteria</i>                     | 765                        |
| 186                        |                             |                               | 1          | <i>Mesoflavibacter sabulilitoris</i> (KJ816860)                           | <i>Bacteroidetes</i>          | 78.55           | ● <i>Bacteroidetes</i>                     | 724                        |



**Table S1.** Phylogenetic affiliations of 16S rRNA gene clones (*Continued*)

| Clone-<br>phylotype<br>No. | Total no. of clones         |                               |            | Related authentic species                        |                               |       | Identity<br>(%)                 | Phylum (Class)<br>classified by CLASSIFIER | Compared<br>length<br>(bp) |
|----------------------------|-----------------------------|-------------------------------|------------|--------------------------------------------------|-------------------------------|-------|---------------------------------|--------------------------------------------|----------------------------|
|                            | <i>Iris<br/>pseudacorus</i> | <i>Scirpus<br/>juncooides</i> | Pond water | Specis (Accession no.)                           | Phylum (Class)                |       |                                 |                                            |                            |
| 187                        |                             |                               | 1          | <i>Fimbriimonas ginsengisoli</i> (CP002763)      | <i>Armatimonadetes</i>        | 88.75 | ● <i>Armatimonadetes</i>        | 712                                        |                            |
| 188                        |                             |                               | 1          | <i>Cryobacterium psychrotolerans</i> (DQ515963)  | <i>Actinobacteria</i>         | 94.99 | ● <i>Actinobacteria</i>         | 678                                        |                            |
| 189                        |                             |                               | 1          | <i>Desulforegula conservatrix</i> (AUEY01000125) | <i>Proteobacteria</i> (Delta) | 84.13 | ● <i>Proteobacteria</i> (Delta) | 694                                        |                            |
| 190                        |                             |                               | 1          | <i>Methylobacter psychrophilus</i> (AF152597)    | <i>Proteobacteria</i> (Gamma) | 94.24 | ● <i>Proteobacteria</i> (Gamma) | 678                                        |                            |
| 191                        |                             |                               | 1          | <i>Kaistia defluvii</i> (AM409365)               | <i>Proteobacteria</i> (Alpha) | 85.91 | ● <i>Proteobacteria</i> (Alpha) | 655                                        |                            |
| 192                        |                             |                               | 1          | <i>Aggregicoccus edonensis</i> (KF767690)        | <i>Proteobacteria</i> (Delta) | 86.29 | ● <i>Proteobacteria</i> (Delta) | 672                                        |                            |
| 193                        |                             |                               | 1          | <i>Flavobacterium cheonanense</i> (GU295968)     | <i>Bacteroidetes</i>          | 96.78 | ● <i>Bacteroidetes</i>          | 683                                        |                            |
| 194                        |                             |                               | 1          | <i>Novosphingobium lentum</i> (AJ303009)         | <i>Proteobacteria</i> (Alpha) | 94.80 | ● <i>Proteobacteria</i> (Alpha) | 714                                        |                            |
| 195                        |                             |                               | 1          | <i>Streptomyces regensis</i> (DQ026649)          | <i>Actinobacteria</i>         | 90.13 | ● <i>Actinobacteria</i>         | 679                                        |                            |
| 196                        |                             |                               | 2          | <i>Alterococcus agarolyticus</i> (AF075271)      | <i>Verrucomicrobia</i>        | 84.99 | ● <i>Verrucomicrobia</i>        | 673                                        |                            |
| 197                        |                             |                               | 1          | <i>Limnohabitans parvus</i> (FM165536)           | <i>Proteobacteria</i> (Beta)  | 97.34 | ● <i>Proteobacteria</i> (Beta)  | 676                                        |                            |
| 198                        |                             |                               | 2          | <i>Aeromonas tecta</i> (AJ458402)                | <i>Proteobacteria</i> (Gamma) | 100   | ● <i>Proteobacteria</i> (Gamma) | 636                                        |                            |
|                            | 95                          | 95                            | 95         |                                                  |                               |       |                                 |                                            |                            |

Partial sequences of the clones shown in bold type were determined, and applied to phylogenetic analysis

The color of circle symbol in the column of "Phylum (Class) classified by CLASSIFIER" corresponds to that of bar describing each phylum in Fig. S1

**Table S2.** Isolated microbes in this study and their related authentic species on the basis of 16S rRNA gene sequence

| Isolate-<br>phylotype | Total no. of isolates   |      |      |      |                           |      |      |      |            | Related authentic species |                                                   |                               | Phylum (Class)<br>classified by CLASSIFIER | Compared<br>length<br>(bp)      |                 |
|-----------------------|-------------------------|------|------|------|---------------------------|------|------|------|------------|---------------------------|---------------------------------------------------|-------------------------------|--------------------------------------------|---------------------------------|-----------------|
|                       | <i>Iris pseudacorus</i> |      |      |      | <i>Scirpus juncooides</i> |      |      |      | Pond water |                           | Species (Accession no.)                           | Phylum (Class)                |                                            |                                 | Identity<br>(%) |
|                       | No.                     | DTSA | DTSG | DR2A | DR2G                      | DTSA | DTSG | DR2A | DR2G       | DTSA                      |                                                   |                               |                                            |                                 |                 |
| 1                     | 2                       | 4    | 1    | 1    |                           |      |      |      |            |                           | <i>Rhizomicrobium electricum</i> (AB365487)       | <i>Proteobacteria</i> (Alpha) | 96.02                                      | ● <i>Proteobacteria</i> (Alpha) | 728             |
| 2                     | 1                       | 2    |      |      |                           |      |      |      |            |                           | <i>Rhizomicrobium palustre</i> (AB081581)         | <i>Proteobacteria</i> (Alpha) | 97.96                                      | ● <i>Proteobacteria</i> (Alpha) | 736             |
| 3                     | 1                       |      |      |      |                           |      |      |      |            |                           | <i>Novosphingobium fuchskuhlense</i> (JN399172)   | <i>Proteobacteria</i> (Alpha) | 99.58                                      | ● <i>Proteobacteria</i> (Alpha) | 721             |
| 4                     | 3                       | 1    |      | 1    |                           |      |      |      |            |                           | <i>Aminobacter anthyllidis</i> (FR869633)         | <i>Proteobacteria</i> (Alpha) | 91.44                                      | ● <i>Proteobacteria</i> (Alpha) | 794             |
| 5                     | 2                       | 2    |      |      |                           |      |      |      |            |                           | <i>Roseiarcus fermentans</i> (KJ406703)           | <i>Proteobacteria</i> (Alpha) | 96.88                                      | ● <i>Proteobacteria</i> (Alpha) | 738             |
| 6                     | 2                       | 1    |      |      |                           |      |      |      |            |                           | <i>Paludibacterium yongneupense</i> (AM396358)    | <i>Proteobacteria</i> (Beta)  | 97.83                                      | ● <i>Proteobacteria</i> (Beta)  | 739             |
| 7                     | 1                       | 1    |      | 1    |                           |      |      |      |            |                           | <i>Paludibacterium yongneupense</i> (AM396358)    | <i>Proteobacteria</i> (Beta)  | 97.41                                      | ● <i>Proteobacteria</i> (Beta)  | 734             |
| 8                     | 1                       |      |      |      |                           |      |      |      |            |                           | <i>Rhodoblastus acidophilus</i> (FR733696)        | <i>Proteobacteria</i> (Alpha) | 99.31                                      | ● <i>Proteobacteria</i> (Alpha) | 722             |
| 9                     | 1                       | 1    | 1    | 1    |                           |      |      |      |            |                           | <i>Rhodoblastus acidophilus</i> (FR733696)        | <i>Proteobacteria</i> (Alpha) | 99.17                                      | ● <i>Proteobacteria</i> (Alpha) | 719             |
| 10                    | 1                       |      |      |      |                           |      |      |      |            |                           | <i>Novosphingobium sedimicola</i> (FJ177534)      | <i>Proteobacteria</i> (Alpha) | 98.56                                      | ● <i>Proteobacteria</i> (Alpha) | 709             |
| 11                    | 2                       | 1    |      |      |                           |      |      |      |            |                           | <i>Rhodopseudomonas thermotolerans</i> (FR851928) | <i>Proteobacteria</i> (Alpha) | 99.86                                      | ● <i>Proteobacteria</i> (Alpha) | 705             |
| 12                    | 1                       | 1    |      |      |                           |      |      |      |            |                           | <i>Bradyrhizobium iriomotense</i> (X87272)        | <i>Proteobacteria</i> (Alpha) | 100                                        | ● <i>Proteobacteria</i> (Alpha) | 715             |
| 13                    | 1                       |      |      |      |                           |      |      |      |            |                           | <i>Herbaspirillum aquaticum</i> (FJ267649)        | <i>Proteobacteria</i> (Beta)  | 100                                        | ● <i>Proteobacteria</i> (Beta)  | 744             |
| 14                    | 1                       |      |      |      |                           |      |      |      |            |                           | <i>Opiritatus terrae</i> (AJ229235)               | <i>Verrucomicrobia</i>        | 89.50                                      | ● <i>Verrucomicrobia</i>        | 734             |
| 15                    | 3                       | 2    |      |      |                           |      |      |      |            |                           | <i>Telmatobacter bradus</i> (AM887760)            | <i>Acidobacteria</i>          | 97.16                                      | ● <i>Acidobacteria</i>          | 740             |
| 16                    | 2                       |      |      |      |                           |      |      |      |            |                           | <i>Rhizomicrobium palustre</i> (AB081581)         | <i>Proteobacteria</i> (Alpha) | 97.20                                      | ● <i>Proteobacteria</i> (Alpha) | 642             |
| 17                    | 1                       | 2    | 1    |      |                           |      |      |      |            |                           | <i>Methylocystis parvus</i> (AJTV01000076)        | <i>Proteobacteria</i> (Alpha) | 92.56                                      | ● <i>Proteobacteria</i> (Alpha) | 739             |
| 18                    | 1                       |      |      |      |                           |      |      |      |            |                           | <i>Roseiarcus fermentans</i> (KJ406703)           | <i>Proteobacteria</i> (Alpha) | 98.07                                      | ● <i>Proteobacteria</i> (Alpha) | 710             |
| 19                    | 1                       |      |      |      |                           |      |      |      |            |                           | <i>Ideonella dechloratans</i> (X72724)            | <i>Proteobacteria</i> (Beta)  | 98.56                                      | ● <i>Proteobacteria</i> (Beta)  | 696             |
| 20                    | 1                       |      |      |      |                           |      |      |      |            |                           | <i>Mycobacterium moriokaense</i> (AJ429044)       | <i>Actinobacteria</i>         | 99.86                                      | ● <i>Actinobacteria</i>         | 708             |
| 21                    | 3                       |      | 1    |      |                           |      |      |      |            |                           | <i>Rhodoblastus sphagnicola</i> (AM040096)        | <i>Proteobacteria</i> (Alpha) | 99.17                                      | ● <i>Proteobacteria</i> (Alpha) | 719             |
| 22                    | 1                       |      |      |      |                           |      |      |      |            |                           | <i>Telmatospirillum siberiense</i> (AF524863)     | <i>Proteobacteria</i> (Alpha) | 97.79                                      | ● <i>Proteobacteria</i> (Alpha) | 723             |
| 23                    | 3                       | 4    | 2    | 3    |                           |      |      |      |            |                           | <i>Uliginosibacterium gangwonense</i> (DQ665916)  | <i>Proteobacteria</i> (Beta)  | 96.60                                      | ● <i>Proteobacteria</i> (Beta)  | 735             |
| 24                    | 5                       |      |      |      |                           |      |      |      |            |                           | <i>Bradyrhizobium elkani</i> (U35000)             | <i>Proteobacteria</i> (Alpha) | 99.44                                      | ● <i>Proteobacteria</i> (Alpha) | 714             |
| 25                    | 2                       | 3    |      | 2    |                           |      |      |      |            |                           | <i>Uliginosibacterium gangwonense</i> (DQ665916)  | <i>Proteobacteria</i> (Beta)  | 96.64                                      | ● <i>Proteobacteria</i> (Beta)  | 715             |
| 26                    | 1                       |      |      |      |                           |      |      |      |            |                           | <i>Flavitalea populi</i> (HM130561)               | <i>Bacteroidetes</i>          | 93.46                                      | ● <i>Bacteroidetes</i>          | 703             |
| 27                    | 1                       |      |      | 1    |                           |      |      |      |            |                           | <i>Rhizomicrobium electricum</i> (AB365487)       | <i>Proteobacteria</i> (Alpha) | 95.83                                      | ● <i>Proteobacteria</i> (Alpha) | 695             |
| 28                    |                         | 3    | 1    |      |                           |      |      |      |            |                           | <i>Ideonella dechloratans</i> (X72724)            | <i>Proteobacteria</i> (Beta)  | 98.75                                      | ● <i>Proteobacteria</i> (Beta)  | 725             |
| 29                    |                         | 1    |      | 3    |                           |      |      |      |            |                           | <i>Telmatobacter bradus</i> (AM887760)            | <i>Acidobacteria</i>          | 97.03                                      | ● <i>Acidobacteria</i>          | 740             |
| 30                    |                         | 1    |      |      |                           |      |      |      |            |                           | <i>Telmatobacter bradus</i> (AM887760)            | <i>Acidobacteria</i>          | 95.39                                      | ● <i>Acidobacteria</i>          | 738             |
| 31                    |                         | 1    |      |      |                           |      |      |      |            |                           | <i>Acidobacterium capsulatum</i> (CP001472)       | <i>Acidobacteria</i>          | 91.88                                      | ● <i>Acidobacteria</i>          | 739             |
| 32                    |                         | 2    |      |      |                           |      |      |      |            |                           | <i>Rubrivivax benzoatilyticus</i> (AEWG01000018)  | <i>Proteobacteria</i> (Beta)  | 97.68                                      | ● <i>Proteobacteria</i> (Beta)  | 732             |
| 33                    |                         | 1    |      |      |                           |      |      |      |            |                           | <i>Uliginosibacterium gangwonense</i> (DQ665916)  | <i>Proteobacteria</i> (Beta)  | 99.20                                      | ● <i>Proteobacteria</i> (Beta)  | 747             |
| 34                    |                         | 1    |      |      |                           |      |      |      |            |                           | <i>Opiritatus terrae</i> (CP001032)               | <i>Verrucomicrobia</i>        | 92.88                                      | ● <i>Verrucomicrobia</i>        | 702             |
| 35                    |                         | 1    |      |      |                           |      | 1    |      |            |                           | <i>Tepidamorphus gemmatus</i> (GU187912)          | <i>Proteobacteria</i> (Alpha) | 91.19                                      | ● <i>Proteobacteria</i> (Alpha) | 715             |
| 36                    |                         | 1    |      |      |                           |      |      |      |            |                           | <i>Flavitalea populi</i> (HM130561)               | <i>Bacteroidetes</i>          | 93.64                                      | ● <i>Bacteroidetes</i>          | 723             |
| 37                    |                         | 1    |      |      |                           |      |      |      |            |                           | <i>Propionicimonas paludicola</i> (AB078858)      | <i>Actinobacteria</i>         | 96.92                                      | ● <i>Actinobacteria</i>         | 714             |



**Table S2.** Isolated microbes in this study and their related authentic species on the basis of 16S rRNA gene sequence (*Continued*)

| Isolate-<br>phylotype | Total no. of isolates   |      |      |      |                           |      |      |      | Related authentic species |      |                                                     |                               | Phylum (Class)<br>classified by CLASSIFIER | Compared<br>length<br>(bp)      |                 |
|-----------------------|-------------------------|------|------|------|---------------------------|------|------|------|---------------------------|------|-----------------------------------------------------|-------------------------------|--------------------------------------------|---------------------------------|-----------------|
|                       | <i>Iris pseudacorus</i> |      |      |      | <i>Scirpus juncooides</i> |      |      |      | Pond water                |      | Species (Accession no.)                             | Phylum (Class)                |                                            |                                 | Identity<br>(%) |
|                       | No.                     | DTSA | DTSG | DR2A | DR2G                      | DTSA | DTSG | DR2A | DR2G                      | DTSA |                                                     |                               |                                            |                                 |                 |
| 38                    |                         | 1    |      |      |                           |      |      |      |                           |      | <i>Opiritatus terrae</i> (AJ229235)                 | <i>Verrucomicrobia</i>        | 94.90                                      | ● <i>Verrucomicrobia</i>        | 725             |
| 39                    |                         | 1    |      |      |                           |      |      |      |                           |      | <i>Novosphingobium lentum</i> (AJ303009)            | <i>Proteobacteria</i> (Alpha) | 98.30                                      | ● <i>Proteobacteria</i> (Alpha) | 717             |
| 40                    |                         | 1    |      |      |                           |      |      |      |                           |      | <i>Novosphingobium lentum</i> (AB682668)            | <i>Proteobacteria</i> (Alpha) | 98.00                                      | ● <i>Proteobacteria</i> (Alpha) | 705             |
| 41                    |                         | 3    | 2    | 1    |                           |      |      |      |                           |      | <i>Bradyrhizobium denitrificans</i> (X66025)        | <i>Proteobacteria</i> (Alpha) | 100                                        | ● <i>Proteobacteria</i> (Alpha) | 695             |
| 42                    |                         | 1    |      |      |                           |      |      |      |                           |      | <i>Methylocystis heyeri</i> (AM283543)              | <i>Proteobacteria</i> (Alpha) | 96.57                                      | ● <i>Proteobacteria</i> (Alpha) | 700             |
| 43                    |                         |      | 2    |      |                           |      |      |      |                           |      | <i>Kineosporia aurantiaca</i> (AB003931)            | <i>Actinobacteria</i>         | 95.44                                      | ● <i>Actinobacteria</i>         | 818             |
| 44                    |                         |      | 1    | 1    |                           |      |      |      |                           |      | <i>Azospirillum halopraeferens</i> (Z29618)         | <i>Proteobacteria</i> (Alpha) | 93.80                                      | ● <i>Proteobacteria</i> (Alpha) | 786             |
| 45                    |                         |      | 2    |      |                           |      |      |      |                           |      | <i>Telmatobacter bradus</i> (AM887760)              | <i>Acidobacteria</i>          | 96.15                                      | ● <i>Acidobacteria</i>          | 808             |
| 46                    |                         |      | 1    |      |                           |      |      |      |                           |      | <i>Rubrivivax gelatinosus</i> (D16213)              | <i>Proteobacteria</i> (Beta)  | 96.93                                      | ● <i>Proteobacteria</i> (Beta)  | 814             |
| 47                    |                         |      | 1    |      |                           |      |      |      |                           |      | <i>Alsobacter metallidurans</i> (AB231946)          | <i>Proteobacteria</i> (Alpha) | 97.10                                      | ● <i>Proteobacteria</i> (Alpha) | 796             |
| 48                    |                         |      | 1    | 2    |                           |      |      |      |                           |      | <i>Bradyrhizobium huanghuaihaiense</i> (HQ231463)   | <i>Proteobacteria</i> (Alpha) | 100                                        | ● <i>Proteobacteria</i> (Alpha) | 789             |
| 49                    |                         |      | 3    |      |                           |      |      |      |                           |      | <i>Bradyrhizobium daqingense</i> (HQ231274)         | <i>Proteobacteria</i> (Alpha) | 99.30                                      | ● <i>Proteobacteria</i> (Alpha) | 788             |
| 50                    |                         |      | 1    |      |                           |      |      |      |                           |      | <i>Geothrix fermentans</i> (U41563)                 | <i>Acidobacteria</i>          | 97.27                                      | ● <i>Acidobacteria</i>          | 807             |
| 51                    |                         |      | 2    |      |                           |      |      |      |                           |      | <i>Novosphingobium ginsenosidimitans</i> (JQ349046) | <i>Proteobacteria</i> (Alpha) | 97.85                                      | ● <i>Proteobacteria</i> (Alpha) | 789             |
| 52                    |                         |      | 1    |      |                           |      |      |      |                           |      | <i>Paludibaculum fermentans</i> (KJ461654)          | <i>Acidobacteria</i>          | 93.54                                      | ● <i>Acidobacteria</i>          | 666             |
| 53                    |                         |      | 1    |      |                           |      |      |      |                           |      | <i>Opiritatus terrae</i> (AJ229235)                 | <i>Verrucomicrobia</i>        | 94.26                                      | ● <i>Verrucomicrobia</i>        | 662             |
| 54                    |                         |      |      | 1    |                           |      |      |      |                           |      | <i>Telmatospirillum siberiense</i> (AF524863)       | <i>Proteobacteria</i> (Alpha) | 97.83                                      | ● <i>Proteobacteria</i> (Alpha) | 736             |
| 55                    |                         |      |      | 1    |                           |      |      |      |                           |      | <i>Derxia gummosa</i> (AB089482)                    | <i>Proteobacteria</i> (Beta)  | 94.35                                      | ● <i>Proteobacteria</i> (Beta)  | 779             |
| 56                    |                         |      |      | 1    |                           |      |      |      |                           |      | <i>Telmatospirillum siberiense</i> (AF524863)       | <i>Proteobacteria</i> (Alpha) | 94.14                                      | ● <i>Proteobacteria</i> (Alpha) | 787             |
| 57                    |                         |      |      | 1    |                           |      |      |      |                           |      | <i>Rhizomicrobium electricum</i> (AB365487)         | <i>Proteobacteria</i> (Alpha) | 96.26                                      | ● <i>Proteobacteria</i> (Alpha) | 776             |
| 59                    |                         |      |      | 1    |                           |      |      |      |                           |      | <i>Skermanella aerolata</i> (NR_043929)             | <i>Proteobacteria</i> (Alpha) | 92.58                                      | ● <i>Proteobacteria</i> (Alpha) | 788             |
| 60                    |                         |      |      | 1    |                           |      |      |      |                           |      | <i>Rhizomicrobium palustre</i> (AB081581)           | <i>Proteobacteria</i> (Alpha) | 97.46                                      | ● <i>Proteobacteria</i> (Alpha) | 788             |
| 61                    |                         |      |      | 1    |                           |      |      |      |                           |      | <i>Carboxylicivirga mesophila</i> (JQ672625 )       | <i>Bacteroidetes</i>          | 87.73                                      | ● <i>Bacteroidetes</i>          | 785             |
| 62                    |                         |      |      |      | 3                         | 2    | 1    | 4    |                           |      | <i>Bradyrhizobium oligotrophica</i> (AP012603)      | <i>Proteobacteria</i> (Alpha) | 99.85                                      | ● <i>Proteobacteria</i> (Alpha) | 666             |
| 63                    |                         |      |      |      | 2                         | 2    |      |      |                           |      | <i>Roseateles aquatilis</i> (AM501446)              | <i>Proteobacteria</i> (Beta)  | 97.60                                      | ● <i>Proteobacteria</i> (Beta)  | 667             |
| 64                    |                         |      |      |      | 1                         | 1    |      |      |                           |      | <i>Rhizomicrobium palustre</i> (AB081581)           | <i>Proteobacteria</i> (Alpha) | 95.28                                      | ● <i>Proteobacteria</i> (Alpha) | 720             |
| 65                    |                         |      |      |      | 1                         |      |      |      |                           |      | <i>Rubrivivax gelatinosus</i> (D16213)              | <i>Proteobacteria</i> (Beta)  | 98.36                                      | ● <i>Proteobacteria</i> (Beta)  | 670             |
| 66                    |                         |      |      |      | 1                         |      |      |      |                           |      | <i>Rubrivivax gelatinosus</i> (D16213)              | <i>Proteobacteria</i> (Beta)  | 97.58                                      | ● <i>Proteobacteria</i> (Beta)  | 661             |
| 67                    |                         |      |      |      | 2                         |      |      | 1    |                           |      | <i>Aquabacterium commune</i> (NR_024875)            | <i>Proteobacteria</i> (Beta)  | 96.35                                      | ● <i>Proteobacteria</i> (Beta)  | 712             |
| 68                    |                         |      |      |      | 1                         | 2    |      | 3    |                           |      | <i>Devosia albogilva</i> (NR_044212)                | <i>Proteobacteria</i> (Alpha) | 91.88                                      | ● <i>Proteobacteria</i> (Alpha) | 677             |
| 69                    |                         |      |      |      | 1                         |      |      |      |                           |      | <i>Hyphomicrobium nitratorans</i> (CP006912)        | <i>Proteobacteria</i> (Alpha) | 91.95                                      | ● <i>Proteobacteria</i> (Alpha) | 671             |
| 70                    |                         |      |      |      | 4                         | 3    |      |      |                           |      | <i>Piscinibacter aquaticus</i> (NR_043921)          | <i>Proteobacteria</i> (Beta)  | 99.04                                      | ● <i>Proteobacteria</i> (Beta)  | 833             |
| 71                    |                         |      |      |      | 1                         | 1    |      |      |                           |      | <i>Caulobacter fusiformis</i> (AJ227759)            | <i>Proteobacteria</i> (Alpha) | 95.77                                      | ● <i>Proteobacteria</i> (Alpha) | 709             |
| 72                    |                         |      |      |      | 1                         |      |      |      |                           |      | <i>Ensifer adhaerens</i> (AM181733)                 | <i>Proteobacteria</i> (Alpha) | 97.65                                      | ● <i>Proteobacteria</i> (Alpha) | 723             |
| 73                    |                         |      |      |      | 1                         |      |      |      |                           |      | <i>Opiritatus terrae</i> (AJ229235)                 | <i>Verrucomicrobia</i>        | 94.71                                      | ● <i>Verrucomicrobia</i>        | 719             |
| 74                    |                         |      |      |      | 1                         |      |      |      |                           |      | <i>Janthinobacterium agaricidamnosum</i> (HQ699437) | <i>Proteobacteria</i> (Alpha) | 95.74                                      | ● <i>Proteobacteria</i> (Alpha) | 727             |
| 75                    |                         |      |      |      | 1                         |      |      | 2    |                           |      | <i>Prosthecomicrobium hirschii</i> (HM037994)       | <i>Proteobacteria</i> (Alpha) | 93.01                                      | ● <i>Proteobacteria</i> (Alpha) | 701             |

**Table S2.** Isolated microbes in this study and their related authentic species on the basis of 16S rRNA gene sequence (*Continued*)

| Isolate-<br>phylogroup | Total no. of isolates   |      |      |      |                           |      |      |      |            | Related authentic species |                         |                                                              | Phylum (Class)<br>classified by CLASSIFIER | Compared<br>length<br>(bp) |                          |      |
|------------------------|-------------------------|------|------|------|---------------------------|------|------|------|------------|---------------------------|-------------------------|--------------------------------------------------------------|--------------------------------------------|----------------------------|--------------------------|------|
|                        | <i>Iris pseudacorus</i> |      |      |      | <i>Scirpus juncooides</i> |      |      |      | Pond water |                           | Species (Accession no.) | Phylum (Class)                                               |                                            |                            | Identity<br>(%)          |      |
|                        | No.                     | DTSA | DTSG | DR2A | DR2G                      | DTSA | DTSG | DR2A | DR2G       | DTSA                      |                         |                                                              |                                            |                            |                          | DTSG |
| 76                     |                         |      |      |      | 2                         |      |      |      |            |                           |                         | <i>Curvibacter delicatus</i> (AF078756)                      | Proteobacteria (Alpha)                     | 98.62                      | ● Proteobacteria (Alpha) | 725  |
| 77                     |                         |      |      |      | 1                         |      |      |      |            |                           |                         | <i>Hyphomicrobium facile</i> subsp. <i>tolerans</i> (Y14311) | Proteobacteria (Alpha)                     | 99.38                      | ● Proteobacteria (Alpha) | 648  |
| 78                     |                         |      |      |      | 1                         | 1    |      |      |            |                           |                         | <i>Methylibium petroleiphilum</i> (AF176594)                 | Proteobacteria (Beta)                      | 98.18                      | ● Proteobacteria (Beta)  | 715  |
| 79                     |                         |      |      |      | 1                         |      |      |      |            |                           |                         | <i>Rhizomicrobium palustre</i> (AB081581)                    | Proteobacteria (Alpha)                     | 98.47                      | ● Proteobacteria (Alpha) | 718  |
| 80                     |                         |      |      |      | 1                         |      |      |      |            |                           |                         | <i>Telmatobacter bradus</i> (AM887760)                       | Acidobacteria                              | 96.07                      | ● Acidobacteria          | 712  |
| 81                     |                         |      |      |      | 4                         | 4    |      |      |            |                           |                         | <i>Rubrivivax gelatinosus</i> (D16213)                       | Proteobacteria (Beta)                      | 97.50                      | ● Proteobacteria (Beta)  | 720  |
| 82                     |                         |      |      |      | 2                         |      |      |      |            |                           |                         | <i>Bradyrhizobium lablabi</i> (GU433448)                     | Proteobacteria (Alpha)                     | 99.56                      | ● Proteobacteria (Alpha) | 685  |
| 83                     |                         |      |      |      | 2                         |      |      |      |            |                           |                         | <i>Roseiarcus fermentans</i> (KJ406703)                      | Proteobacteria (Alpha)                     | 97.43                      | ● Proteobacteria (Alpha) | 622  |
| 84                     |                         |      |      |      | 1                         |      |      |      |            |                           |                         | <i>Kineosporia rhamnosa</i> (AB003935)                       | Actinobacteria                             | 96.54                      | ● Actinobacteria         | 668  |
| 85                     |                         |      |      |      | 1                         |      |      |      |            |                           |                         | <i>Phenylobacterium lituiforme</i> (AY534887)                | Proteobacteria (Alpha)                     | 96.71                      | ● Proteobacteria (Alpha) | 668  |
| 86                     |                         |      |      |      | 1                         |      |      |      |            |                           |                         | <i>Azoarcus buckelii</i> (AJ315676)                          | Proteobacteria (Beta)                      | 95.48                      | ● Proteobacteria (Beta)  | 664  |
| 87                     |                         |      |      |      | 7                         | 6    | 5    |      |            |                           |                         | <i>Ideonella azotifigens</i> (EU542576)                      | Proteobacteria (Beta)                      | 98.34                      | ● Proteobacteria (Beta)  | 725  |
| 88                     |                         |      |      |      |                           | 4    |      | 2    |            |                           |                         | <i>Devosia yakushimensis</i> (AB682141)                      | Proteobacteria (Alpha)                     | 91.18                      | ● Proteobacteria (Alpha) | 795  |
| 89                     |                         |      |      |      |                           | 2    |      |      |            |                           |                         | <i>Ideonella dechloratans</i> (X72724)                       | Proteobacteria (Beta)                      | 98.75                      | ● Proteobacteria (Beta)  | 724  |
| 90                     |                         |      |      |      |                           | 1    |      |      |            |                           |                         | <i>Rhodoblastus acidophilus</i> (FR733696)                   | Proteobacteria (Alpha)                     | 98.35                      | ● Proteobacteria (Alpha) | 787  |
| 91                     |                         |      |      |      |                           | 2    |      |      |            |                           |                         | <i>Bradyrhizobium japonicum</i> (AP012206)                   | Proteobacteria (Alpha)                     | 99.35                      | ● Proteobacteria (Alpha) | 768  |
| 92                     |                         |      |      |      |                           | 1    |      |      |            |                           |                         | <i>Sinorhizobium chiapanecum</i> (EU286550)                  | Proteobacteria (Alpha)                     | 93.24                      | ● Proteobacteria (Alpha) | 725  |
| 93                     |                         |      |      |      |                           | 1    |      |      |            |                           |                         | <i>Rhizomicrobium palustre</i> (AB081581)                    | Proteobacteria (Alpha)                     | 98.55                      | ● Proteobacteria (Alpha) | 761  |
| 94                     |                         |      |      |      |                           | 1    |      |      |            |                           |                         | <i>Telmatobacter bradus</i> (AM887760)                       | Acidobacteria                              | 96.56                      | ● Acidobacteria          | 788  |
| 95                     |                         |      |      |      |                           | 2    |      |      |            |                           |                         | <i>Opitutus terrae</i> (AJ229235)                            | Verrucomicrobia                            | 94.77                      | ● Verrucomicrobia        | 727  |
| 96                     |                         |      |      |      |                           | 1    |      |      |            |                           |                         | <i>Kineococcus xinjiangensis</i> (JQ314347)                  | Actinobacteria                             | 93.46                      | ● Actinobacteria         | 797  |
| 97                     |                         |      |      |      |                           | 1    |      |      |            |                           |                         | <i>Terrimonas lutea</i> (AB192292)                           | Bacteroidetes                              | 91.70                      | ● Bacteroidetes          | 723  |
| 98                     |                         |      |      |      |                           | 1    |      |      |            |                           |                         | <i>Rhodobium orientis</i> (D30792)                           | Proteobacteria (Alpha)                     | 89.86                      | ● Proteobacteria (Alpha) | 732  |
| 99                     |                         |      |      |      |                           | 1    |      |      |            |                           |                         | <i>Azoarcus buckelii</i> (AJ315676)                          | Proteobacteria (Beta)                      | 87.82                      | ● Proteobacteria (Beta)  | 790  |
| 100                    |                         |      |      |      |                           | 1    |      |      |            |                           |                         | <i>Rhodobacter blasticus</i> (DQ342322)                      | Proteobacteria (Alpha)                     | 97.12                      | ● Proteobacteria (Alpha) | 729  |
| 101                    |                         |      |      |      |                           | 1    |      |      |            |                           |                         | <i>Opitutus terrae</i> (AJ229235)                            | Verrucomicrobia                            | 94.06                      | ● Verrucomicrobia        | 724  |
| 102                    |                         |      |      |      |                           | 1    |      |      |            |                           |                         | <i>Acidicapsa ligni</i> (EU780204)                           | Acidobacteria                              | 96.31                      | ● Acidobacteria          | 732  |
| 103                    |                         |      |      |      |                           | 1    |      |      |            |                           |                         | <i>Sporichthya polymorpha</i> (AB025317)                     | Actinobacteria                             | 93.95                      | ● Actinobacteria         | 777  |
| 104                    |                         |      |      |      |                           | 1    |      |      |            |                           |                         | <i>Roseiarcus fermentans</i> (KJ406703)                      | Proteobacteria (Alpha)                     | 96.75                      | ● Proteobacteria (Alpha) | 707  |
| 105                    |                         |      |      |      |                           |      | 1    |      |            |                           |                         | <i>Ideonella dechloratans</i> (X72724)                       | Proteobacteria (Beta)                      | 96.42                      | ● Proteobacteria (Beta)  | 816  |
| 106                    |                         |      |      |      |                           |      | 1    |      |            |                           |                         | <i>Bradyrhizobium daqingense</i> (HQ231274)                  | Proteobacteria (Alpha)                     | 99.29                      | ● Proteobacteria (Alpha) | 790  |
| 107                    |                         |      |      |      |                           |      | 1    | 1    |            |                           |                         | <i>Aquicola tertiarycarbonis</i> (DQ656489)                  | Proteobacteria (Beta)                      | 97.24                      | ● Proteobacteria (Beta)  | 799  |
| 108                    |                         |      |      |      |                           |      | 1    |      |            |                           |                         | <i>Novosphingobium ginsenosidimitans</i> (JQ349046)          | Proteobacteria (Alpha)                     | 98.36                      | ● Proteobacteria (Alpha) | 791  |
| 109                    |                         |      |      |      |                           |      | 1    |      |            |                           |                         | <i>Steroidobacter denitrificans</i> (EF605262)               | Proteobacteria (Gamma)                     | 88.12                      | ● Proteobacteria (Gamma) | 827  |
| 110                    |                         |      |      |      |                           |      | 2    |      |            |                           |                         | <i>Roseiarcus fermentans</i> (KJ406703)                      | Proteobacteria (Alpha)                     | 95.91                      | ● Proteobacteria (Alpha) | 811  |
| 111                    |                         |      |      |      |                           |      | 1    |      |            |                           |                         | <i>Tepidamorphus gemmatus</i> (GU187912)                     | Proteobacteria (Alpha)                     | 91.03                      | ● Proteobacteria (Alpha) | 818  |
| 112                    |                         |      |      |      |                           |      | 1    |      |            |                           |                         | <i>Prosthecomicrobium hirschii</i> (GQ221763)                | Proteobacteria (Alpha)                     | 94.42                      | ● Proteobacteria (Alpha) | 812  |

**Table S2.** Isolated microbes in this study and their related authentic species on the basis of 16S rRNA gene sequence (*Continued*)

| Isolate-<br>phylotype | Total no. of isolates   |      |      |      |                           |      |      |      | Related authentic species |      |                                                     |                               | Phylum (Class)<br>classified by CLASSIFIER | Compared<br>length<br>(bp)      |                 |
|-----------------------|-------------------------|------|------|------|---------------------------|------|------|------|---------------------------|------|-----------------------------------------------------|-------------------------------|--------------------------------------------|---------------------------------|-----------------|
|                       | <i>Iris pseudacorus</i> |      |      |      | <i>Scirpus juncooides</i> |      |      |      | Pond water                |      | Species (Accession no.)                             | Phylum (Class)                |                                            |                                 | Identity<br>(%) |
|                       | DTSA                    | DTSG | DR2A | DR2G | DTSA                      | DTSG | DR2A | DR2G | DTSA                      | DTSG |                                                     |                               |                                            |                                 |                 |
| 113                   |                         |      |      |      |                           |      | 1    |      |                           |      | <i>Methylibium petroleiphilum</i> (AF176594)        | <i>Proteobacteria</i> (Beta)  | 97.32                                      | ● <i>Proteobacteria</i> (Beta)  | 821             |
| 114                   |                         |      |      |      |                           |      | 1    |      |                           |      | <i>Rhodoblastus sphagnicola</i> (AM040096)          | <i>Proteobacteria</i> (Alpha) | 98.61                                      | ● <i>Proteobacteria</i> (Alpha) | 792             |
| 115                   |                         |      |      |      |                           |      | 1    |      |                           |      | <i>Roseomonas aquatica</i> (AM231587)               | <i>Proteobacteria</i> (Alpha) | 93.34                                      | ● <i>Proteobacteria</i> (Alpha) | 796             |
| 116                   |                         |      |      |      |                           |      | 1    |      |                           |      | <i>Ancylobacter defluvii</i> (KC243678)             | <i>Proteobacteria</i> (Alpha) | 93.66                                      | ● <i>Proteobacteria</i> (Alpha) | 813             |
| 117                   |                         |      |      |      |                           |      | 1    |      |                           |      | <i>Opitutus terrae</i> (AJ229235)                   | <i>Verrucomicrobia</i>        | 91.89                                      | ● <i>Verrucomicrobia</i>        | 838             |
| 118                   |                         |      |      |      |                           |      | 1    |      |                           |      | <i>Labrys okinawensis</i> (AB236169)                | <i>Proteobacteria</i> (Alpha) | 93.30                                      | ● <i>Proteobacteria</i> (Alpha) | 810             |
| 119                   |                         |      |      |      |                           |      | 1    |      |                           |      | <i>Hyphomicrobium hollandicum</i> (Y14303)          | <i>Proteobacteria</i> (Alpha) | 90.96                                      | ● <i>Proteobacteria</i> (Alpha) | 816             |
| 120                   |                         |      |      |      |                           |      | 1    |      |                           |      | <i>Telmatospirillum siberiense</i> (NR_041925)      | <i>Proteobacteria</i> (Alpha) | 95.05                                      | ● <i>Proteobacteria</i> (Alpha) | 813             |
| 121                   |                         |      |      |      |                           |      | 1    |      |                           |      | <i>Beijerinckia mobilis</i> (AJ563932)              | <i>Proteobacteria</i> (Alpha) | 93.28                                      | ● <i>Proteobacteria</i> (Alpha) | 791             |
| 122                   |                         |      |      |      |                           |      |      |      | 4                         |      | <i>Ideonella dechloratans</i> (X72724)              | <i>Proteobacteria</i> (Beta)  | 98.87                                      | ● <i>Proteobacteria</i> (Beta)  | 798             |
| 123                   |                         |      |      |      |                           |      |      |      | 1                         |      | <i>Caulobacter profunda</i> (KF360052)              | <i>Proteobacteria</i> (Alpha) | 95.84                                      | ● <i>Proteobacteria</i> (Alpha) | 789             |
| 124                   |                         |      |      |      |                           |      |      |      | 4                         |      | <i>Aquabacterium commune</i> (AF035054)             | <i>Proteobacteria</i> (Beta)  | 97.20                                      | ● <i>Proteobacteria</i> (Beta)  | 787             |
| 125                   |                         |      |      |      |                           |      |      |      | 1                         |      | <i>Asticcacaulis excentricus</i> (AB016610)         | <i>Proteobacteria</i> (Alpha) | 95.84                                      | ● <i>Proteobacteria</i> (Alpha) | 721             |
| 126                   |                         |      |      |      |                           |      |      |      | 1                         |      | <i>Prosthecomicrobium hirschii</i> (HM037994)       | <i>Proteobacteria</i> (Alpha) | 95.53                                      | ● <i>Proteobacteria</i> (Alpha) | 788             |
| 127                   |                         |      |      |      |                           |      |      |      | 1                         |      | <i>Hyphomicrobium hollandicum</i> (Y14303)          | <i>Proteobacteria</i> (Alpha) | 90.86                                      | ● <i>Proteobacteria</i> (Alpha) | 789             |
| 128                   |                         |      |      |      |                           |      |      | 2    | 11                        |      | <i>Novosphingobium fuchskuhlense</i> (AF235996)     | <i>Proteobacteria</i> (Alpha) | 99.44                                      | ● <i>Proteobacteria</i> (Alpha) | 710             |
| 129                   |                         |      |      |      |                           |      |      | 1    | 1                         |      | <i>Herbaspirillum seropedicae</i> (Y10146)          | <i>Proteobacteria</i> (Beta)  | 97.88                                      | ● <i>Proteobacteria</i> (Beta)  | 708             |
| 130                   |                         |      |      |      |                           |      |      |      | 10                        |      | <i>Pelomonas puraquae</i> (AM501439)                | <i>Proteobacteria</i> (Beta)  | 99.72                                      | ● <i>Proteobacteria</i> (Beta)  | 714             |
| 131                   |                         |      |      |      |                           |      |      |      | 22                        |      | <i>Limnohabitans curvus</i> (AJ938026)              | <i>Proteobacteria</i> (Beta)  | 97.90                                      | ● <i>Proteobacteria</i> (Beta)  | 713             |
| 132                   |                         |      |      |      |                           |      |      | 1    | 18                        |      | <i>Flavobacterium cheonanense</i> (GU295968)        | <i>Bacteroidetes</i>          | 97.24                                      | ● <i>Bacteroidetes</i>          | 726             |
| 133                   |                         |      |      |      |                           |      |      | 2    |                           |      | <i>Novosphingobium ginsenosidimitans</i> (JQ349046) | <i>Proteobacteria</i> (Alpha) | 99.58                                      | ● <i>Proteobacteria</i> (Alpha) | 720             |
| 134                   |                         |      |      |      |                           |      |      | 1    |                           |      | <i>Novosphingobium naphthalenivorans</i> (AB177883) | <i>Proteobacteria</i> (Alpha) | 94.80                                      | ● <i>Proteobacteria</i> (Alpha) | 712             |
| 135                   |                         |      |      |      |                           |      |      | 2    | 3                         |      | <i>Sandarakinorhabdus limnophila</i> (AY902680)     | <i>Proteobacteria</i> (Alpha) | 99.16                                      | ● <i>Proteobacteria</i> (Alpha) | 714             |
| 136                   |                         |      |      |      |                           |      |      | 2    |                           |      | <i>Intrasporangium mesophilum</i> ( FJ428831)       | <i>Actinobacteria</i>         | 90.47                                      | ● <i>Actinobacteria</i>         | 703             |
| 137                   |                         |      |      |      |                           |      |      | 2    | 1                         |      | <i>Tabrizicola aquatica</i> (HQ392507)              | <i>Proteobacteria</i> (Alpha) | 98.11                                      | ● <i>Proteobacteria</i> (Alpha) | 689             |
| 138                   |                         |      |      |      |                           |      |      | 0    | 1                         |      | <i>Flavobacterium aquidurense</i> (JX657043)        | <i>Bacteroidetes</i>          | 95.75                                      | ● <i>Bacteroidetes</i>          | 777             |
| 139                   |                         |      |      |      |                           |      |      | 0    | 1                         |      | <i>Flavobacterium fontis</i> (JN873147)             | <i>Bacteroidetes</i>          | 98.14                                      | ● <i>Bacteroidetes</i>          | 808             |
| 140                   |                         |      |      |      |                           |      |      | 0    | 3                         |      | <i>Aeromonas tecta</i> (AJ458402)                   | <i>Proteobacteria</i> (Gamma) | 99.51                                      | ● <i>Proteobacteria</i> (Gamma) | 818             |
| 141                   |                         |      |      |      |                           |      |      | 0    | 1                         |      | <i>Aeromonas sharmiana</i> (DQ013306)               | <i>Proteobacteria</i> (Gamma) | 96.18                                      | ● <i>Proteobacteria</i> (Gamma) | 813             |
| 142                   |                         |      |      |      |                           |      |      | 0    | 3                         |      | <i>Flavobacterium koreense</i> (GU295967)           | <i>Bacteroidetes</i>          | 96.67                                      | ● <i>Bacteroidetes</i>          | 814             |
| 143                   |                         |      |      |      |                           |      |      | 0    | 1                         |      | <i>Taibaiella koreensis</i> (KC252613)              | <i>Bacteroidetes</i>          | 90.09                                      | ● <i>Bacteroidetes</i>          | 777             |
| 144                   |                         |      |      |      |                           |      |      | 0    | 1                         |      | <i>Hyphomicrobium nitrativorans</i> (CP006912)      | <i>Proteobacteria</i> (Alpha) | 92.73                                      | ● <i>Proteobacteria</i> (Alpha) | 772             |
| Total                 | 45                      | 45   | 25   | 25   | 45                        | 45   | 25   | 25   | 45                        | 45   |                                                     |                               |                                            |                                 |                 |

Partial sequences of the strains shown in bold type were determined, and applied to phylogenetic analysis

The color of circle symbol in the column of "Phylum (Class) classified by CLASSIFIER" corresponds to that of bar describing each phylum in Fig. S1

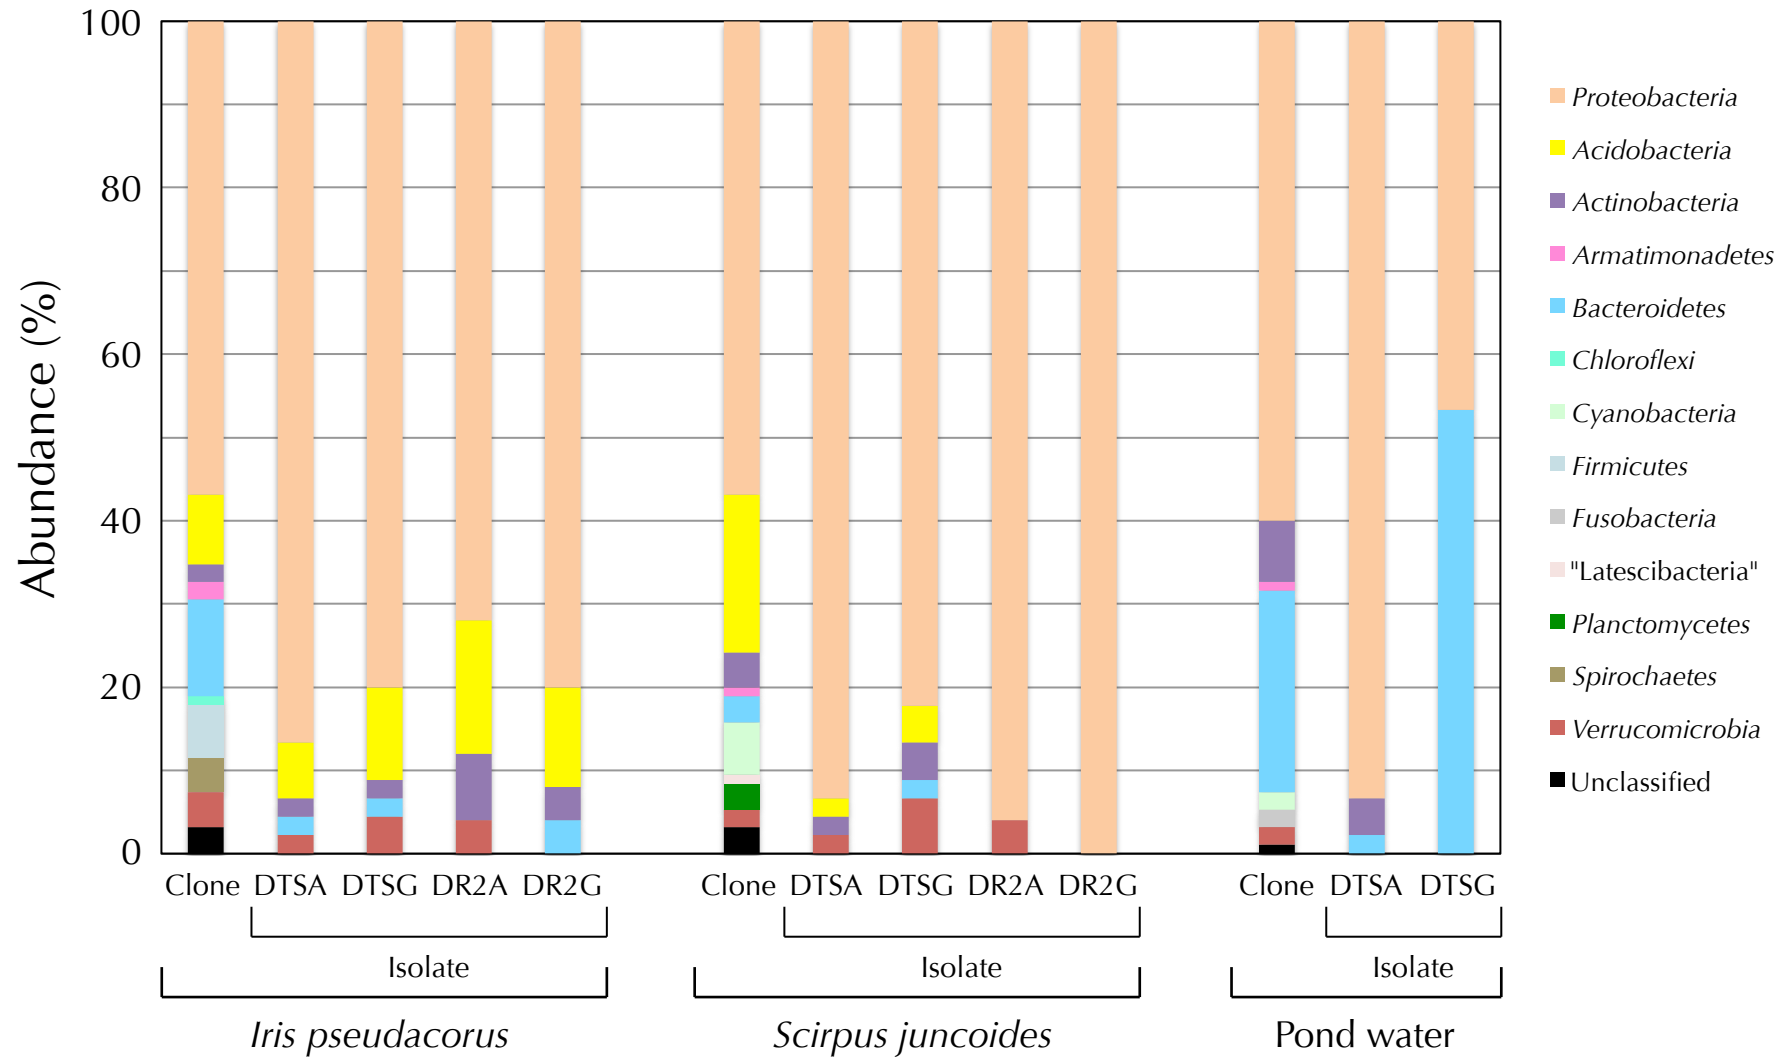

Fig. S1  
Tanaka et al.

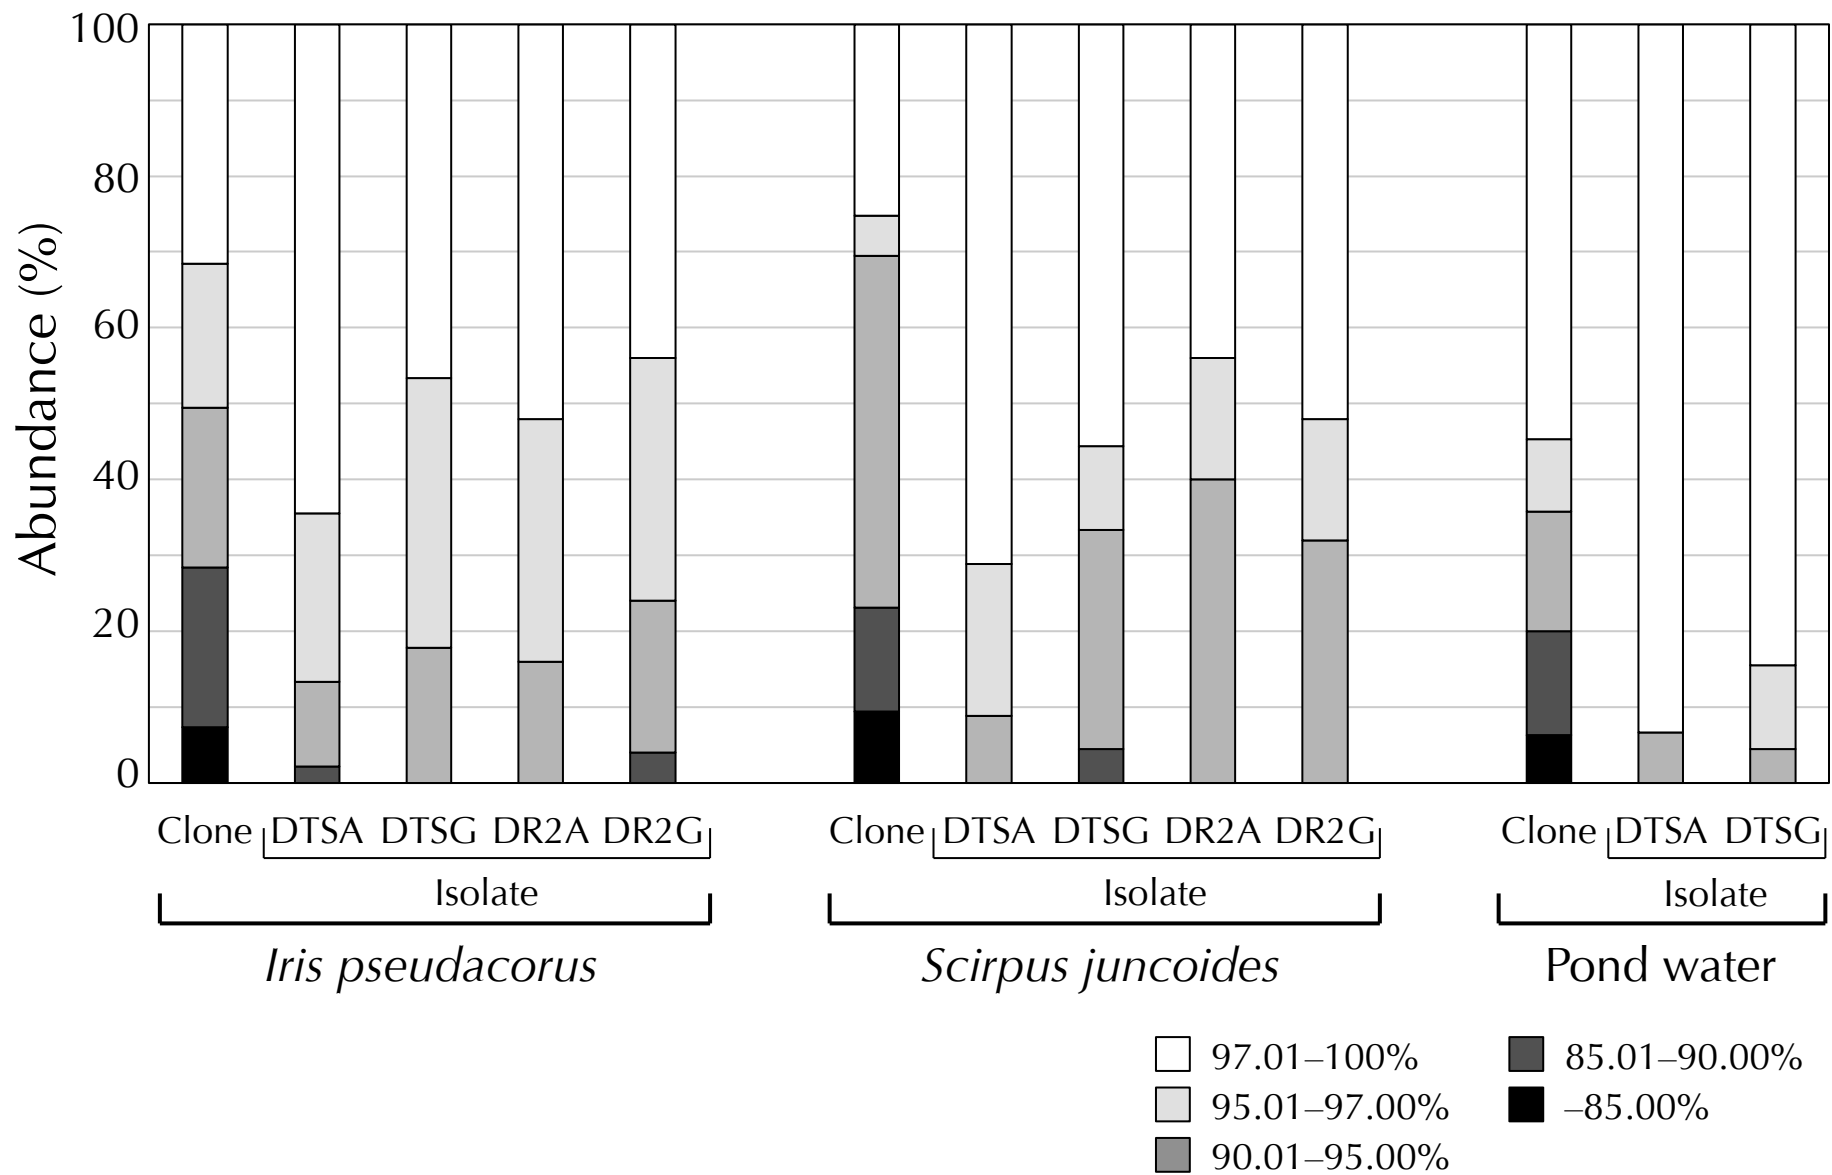

Fig. S2  
Tanaka *et al.*

## Figure legends

**Fig. S1.** Phylogenetic distribution of the 16S rRNA gene clones and isolates at the level of phylum in the roots of two emergent plants, *I. pseudacorus* and *S. juncooides*, and pond water.

**Fig. S2.** Abundance of novel clonal 16S rRNA gene sequences and isolates obtained from the roots of two emergent plants, *I. pseudacorus* and *S. juncooides*, and pond water. The similarity percentages between the clones or isolates and their closest authentic species in the EZ BioCloud database are shown.
